# Supplementary material
Source: PubMed Central journal article supplement (PMC2869118)
Supplement: supp_76_10_3263__1.pdf [file supp_76_10_3263__1.pdf]

Table S1: Primers used in this study

| <b>Construction of pNPTS138-R6KT</b>                                |                                                               |                         |
|---------------------------------------------------------------------|---------------------------------------------------------------|-------------------------|
| <b>Primer name</b>                                                  | <b>Sequence (5' to 3')</b>                                    | <b>Restriction site</b> |
| <i>BssSI</i> -R6KT-for                                              | GCA <u>TCA CGA GCC</u> TTA AGG TAT ACT TTC CGC TGC            | <i>BssSI</i>            |
| <i>DraIII</i> -R6KT-rev                                             | GAA <u>TCA CTA CGT GCC</u> GGT TGT CAG CCG TTA AGT G          | <i>DraIII</i>           |
| <b>In-frame Deletions in <i>Shewanella sp.</i> Arc-coding genes</b> |                                                               |                         |
| <b>Primer name</b>                                                  | <b>Sequence (5' to 3')</b>                                    | <b>Restriction site</b> |
| <b><u>SO 0577 (<i>arcS</i>)</u></b>                                 |                                                               |                         |
| <i>XbaI</i> -ΔSO_0577-us-for                                        | CGT CTA GAG CGT TGT TCG TTC ACG CTT GG                        | <i>XbaI</i>             |
| ΔSO_0577-us-rev                                                     | <b>ATG CTT GTG</b> CTC TTC GCG CTG CTC CAT CT                 |                         |
| ΔSO_0577-ds-for                                                     | <b>CGC GAA GAG</b> CAC AAG CAT AAT CAC CGT TAA TTG TTC        |                         |
| <i>NcoI</i> -ΔSO_0577-ds-rev                                        | <u>ATC CAT GGC</u> GTT TTT CAG CGG CAT CTT GGG                | <i>NcoI</i>             |
| ΔSO_0577-chk-for                                                    | CAG CGC AAA CCT GTA TCT GA                                    |                         |
| ΔSO_0577-chk-rev                                                    | CAC GAG GTT GAT ACC CAT CC                                    |                         |
| <i>SacI</i> -RBS-SO_0577-for                                        | <u>TGA GCT CAG</u> GAG GAT TTA TAT GGA GCA GCG CGA AGA GC     | <i>SacI</i>             |
| <i>XbaI</i> -RBS-SO_0577-rev                                        | <u>GTC TAG ATT</u> AAC GGT GAT TAT GCT TGT GTT TAA TCC        | <i>XbaI</i>             |
| <b><u>SO 1327 (<i>hptA</i>)</u></b>                                 |                                                               |                         |
| <i>PspOMI</i> -ΔSO_1327-us-for                                      | TAT <u>AGG GCC CAA</u> ACA CCG CTC GAT TAT ATG GCG            | <i>PspOMI</i>           |
| ΔSO_1327-us-rev                                                     | <b>GCT TTA GCC TGT</b> AAT TCA ACT GTG GCC ATC GAG G          |                         |
| ΔSO_1327-ds-for                                                     | <b>GTT GAA TTA</b> CAG GCT AAA GCC TAA TTT GTT TCG C          |                         |
| <i>EcoRI</i> -ΔSO_1327-ds-rev                                       | <u>CGA ATT CCT</u> GAG TAG AAA CGG CGC AAT GG                 | <i>EcoRI</i>            |
| SO_1327-chk-for                                                     | CGA TGT ATG GTT AGA GCT GGG C                                 |                         |
| SO_1327-chk-rev                                                     | GCA TCG AGT AAA CGT TCC GTC G                                 |                         |
| <i>KpnI</i> -RBS-SO_1327-for                                        | <u>CTG GTA CCA</u> GGA GGA TTA CGA TGG CCA CAG TTG AAT TAG AG | <i>KpnI</i>             |
| <i>XbaI</i> -SO_1327-rev                                            | <u>GTC TAG ATT</u> AGG CTT TAG CCT GTA AGA ATT GC             | <i>XbaI</i>             |

| Primer name                                                                                                                              | Sequence (5' to 3')                                            | Restriction site |
|------------------------------------------------------------------------------------------------------------------------------------------|----------------------------------------------------------------|------------------|
| <b>SO_3988 (<i>arcA</i>)</b>                                                                                                             |                                                                |                  |
| <i>Bam</i> HI-ΔSO_3988-us-for                                                                                                            | TGG ATC CAC GGC GTT TGA TAA TGC TGC C                          | <i>Bam</i> HI    |
| ΔSO_3988-us-rev                                                                                                                          | GCA GAA ACG GTG CGG ATT TTG CAT ATT AAG TAC CT                 |                  |
| ΔSO_3988-ds-for                                                                                                                          | AAT CCG CAC CGT TTC TGC GGT AAC TTA GAA GAC                    |                  |
| <i>Pst</i> I-ΔSO_3988-ds-rev                                                                                                             | CAT CTG CAG CCG ATT GGC GTT TGT ATG ACA CC                     | <i>Pst</i> I     |
| SO_3988-chk-for                                                                                                                          | GGG TTA TGG GCG GTA ATT ACA GC                                 |                  |
| SO_3988-chk-rev                                                                                                                          | GCG ATT TAT GGC CAC AGC TAC G                                  |                  |
| <i>Kpn</i> I-RBS-SO_3988-for                                                                                                             | CAG GTA CCA GGA GGA TAA AGA TGC AAA ATC CGC ACA TTC TGA<br>TCG | <i>Kpn</i> I     |
| <i>Xba</i> I-RBS-SO_3988-rev                                                                                                             | CGC TCT AGA TTA GTC TTC TAA GTT ACC GCA GAA ACG                | <i>Xba</i> I     |
| <b>SputCN32_3300 (<i>arcS</i>)</b>                                                                                                       |                                                                |                  |
| <i>Sal</i> I-ΔSputCN32_3300-us-for                                                                                                       | CTA GTC GAC TAC CCT CAA TGA CCT TCC CTT GC                     | <i>Sal</i> I     |
| ΔSputCN32_3300-us-rev                                                                                                                    | TCG AGT GAG TGG ATC CAG CAC AAG AAC CAG C                      |                  |
| ΔSputCN32_3300-ds-for                                                                                                                    | CTG GAT CCA CTC ACT CGA TTT CAT CCA CTA CCC                    |                  |
| <i>Eco</i> RI-SputCN32_3300-ds-rev                                                                                                       | CGA ATT CAG TCG ATT AAC TTT ATG CGT GGC C                      | <i>Eco</i> RI    |
| SputCN32_3300-chk-for                                                                                                                    | ACG TAA GCT GGA CAT CAA CAT CG                                 |                  |
| SputCN32_3300-chk-rev                                                                                                                    | CGG GCA GTC TCA ATT ACA TTA TGG                                |                  |
| <b>Construction of pBAD33-<i>arcB</i> (<i>E.coli</i> K12-MG1655) to complement <i>S. oneidensis</i> MR-1 <i>arc</i>-deletion mutants</b> |                                                                |                  |
| Primer name                                                                                                                              | Sequence (5' to 3')                                            | Restriction site |
| <i>Kpn</i> I-RBS-ArcB(MG1655)-for                                                                                                        | CGG TAC CAG GAG GTC CCT AAT GAA GCA AAT TCG TCT GC             | <i>Kpn</i> I     |
| <i>Xba</i> I-ArcB (MG1655)-rev                                                                                                           | ATC TAG AGC CGG GGT CAT TTT TTA GTG GC                         | <i>Xba</i> I     |

## Quantitative Realtime PCR of selected genes regulated by ArcS

| Primer name                | Sequence (5' to 3')                 | Restriction site |
|----------------------------|-------------------------------------|------------------|
| recA-Q-PCR-651-for         | TCA CAT CAA CCG CAC CAG AAC G       |                  |
| recA-Q-PCR-781-rev         | CGC TCT TGA TCC TAT CTA CGC G       |                  |
| csgA-Q-PCR-971-for         | CGT ATT GTT TGA TAT CGC CGT CG      |                  |
| csgA-Q-PCR-1109-rev        | CAA TTA GGT GAG CTG AAC GAA AGC     |                  |
| csgB-Q-PCR-249-for         | TTG GTT TGC AGT TCC TTG CTG C       |                  |
| csgB-Q-PCR-348-rev         | TAT CTG ACA CCC ACC CAT GCG         |                  |
| dmsA-Q-PCR-134-for         | GTC ATC TTG CTT GGT TAA CTG TGG     |                  |
| dmsA-Q-PCR-226-rev         | GGT GGT TGC CAT ACT CAT CAT TGG     |                  |
| dmsB-Q-PCR-113-for         | CGA TGT GAT GAA TAA TGG TGT CGC     |                  |
| dmsB-Q-PCR-219-rev         | TAC AAC CAA TAG ACA TGT AGT AGG CAA |                  |
| aggA-Q-PCR-109-for         | GCA CAC ACA CTC GAT ACA AAC CC      |                  |
| aggA-Q-PCR-210-rev         | CCA TAA CCA CCA GTG AGA TCA ACT     |                  |
| SO_4179-Q-PCR-1050-for     | GTA AAC CTG TTC GAT AAA GGA GTC G   |                  |
| SO_4179-Q-PCR-PCR-1148-rev | TTT CGT GCA GAT CCC TCG GC          |                  |
| SO_4180-Q-PCR-1197-for     | ACA CTT ATC TTG TTC TTC AGC TTG C   |                  |
| SO_4180-Q-PCR-1307-rev     | ATT GGT CCC TGT CAT CAG CAC C       |                  |
| rpoS-Q-PCR-819-for         | TGT GGC ATC AAG ATT TTT TTG CAG G   |                  |
| rpoS-Q-PCR-908-rev         | TGA TAC CGC TGA GTT TGA TCT CG      |                  |
| SO_2427-2009-Q-PCR-for     | CTA CCG TTC ATA TCA AAC TGG AAG C   |                  |
| SO_2427-2126-Q-PCR rev     | GCG TTG AAA TCC TGA AAG ATG GC      |                  |

## Overexpression of *S. oneidensis* MR-1 Arc-components

| Primer name                      | Sequence (5' to 3')                                              | Restriction site |
|----------------------------------|------------------------------------------------------------------|------------------|
| <i>BglII</i> -NOE-SO_0577-for    | CAT GCA <u>AGA TCT</u> GTA CCC ATA AGG ATA TTA CCC GCC           | <i>BglII</i>     |
| <i>HindIII</i> -SO_0577-rev      | TCA <u>AGC TTT</u> TAA CGG TGA TTA TGC TTG TGT TTA ATC           | <i>HindIII</i>   |
| <i>BglII</i> -NOE-arcA-for       | CAG <u>GTA CCT</u> TAG TCT TCT AAG TTA CCG CAG AAA CG            | <i>BglII</i>     |
| <i>KpnI</i> -arcA-Rev            | ACT GGA <u>AGA TCT</u> CGA TAT CGA TAT ATT TAG TTG ACG ATC ATG A | <i>KpnI</i>      |
| <i>EcoRI</i> -hptA-for           | CGA <u>ATT CAT</u> GGC CAC AGT TGA ATT AGA GAC AAT C             | <i>EcoRI</i>     |
| <i>XhoI</i> -hptA-rev            | <u>ACT CGA GTT</u> AGG CTT TAG CCT GTA AGA ATT GC                | <i>XhoI</i>      |
| <i>XhoI</i> -SO_3457-181-for     | <u>TCT CGA GGC</u> CGC CTT TAT TAT CGT GTT GAT TG                | <i>XhoI</i>      |
| <i>EcoRI</i> -SO_3457-C-Term-rev | <u>CGA ATT CTT</u> AAA GAA GCC CGT TTT TTT GGT CAT C             | <i>EcoRI</i>     |
| arcA-OL-D54N-for                 | ACC TCG TGG TTA TGA ACA TTA ACC                                  |                  |
| arcA-OL-D54N-rev                 | GGT TAA TGT TCA TAA CCA CGA GGT                                  |                  |
| hptA-OL-H62A-for                 | CTC GGA AGC CGC TAA ATT TAA AGG                                  |                  |
| hptA-OL-H62A-rev                 | CCT TTA AAT TTA GCG GCT TCC GAG                                  |                  |
| Seq33-Fw-100                     | GGC GTC CAC ACT TTG CTA TGC                                      |                  |
| pBAD-HisA-rev                    | CAG TTC CCT ACT CTC GCA TG                                       |                  |
| pGEX4T1-for                      | GGG CTG GCA AGC CAC GTT TGG TG                                   |                  |
| pGEX4T1-rev                      | CCG GGA GCT GCA TGT GTC AGA GG                                   |                  |

### Bacterial Two Hybrid on *S. oneidensis* MR-1 Arc-System

| Primer name           | Sequence (5' to 3')                                      | Restriction site |
|-----------------------|----------------------------------------------------------|------------------|
| pKT25-for             | CAC TGA CGG CGG ATA TCG ACA TGT T                        |                  |
| pKT25-rev             | CCG CCG GAC ATC AGC GCC ATT C                            |                  |
| pUT18-for             | CCA GGC TTT ACA CTT TAT GCT TCC                          |                  |
| pUT18-rev             | GAC GCG CCT CGG TGC CCA CTG C                            |                  |
| pKNT25-for            | CCC AGG CTT TAC ACT TTA TGC TTC C                        |                  |
| pKNT25-rev            | GTT TTT TTC CTT CGC CAC GGC CTT G                        |                  |
| pUT18C-for            | CGG CGT GCC GAG CGG ACG TTC G                            |                  |
| pUT18C-rev            | TCA GCG GGT GTT GGC GGG TGT C                            |                  |
| PAS-SO_0577-for       | GTC TAG AGC TAC TGG TGA GCC GAA TTT TTG AG               | <i>XbaI</i>      |
| HisKA-SO_0577-for     | GTC TAG AGG GTA CCC ATA AGG ATA TTA CCC GC               | <i>XbaI</i>      |
| Rec-SO_0577-rev       | GAT <u>CCC GGG</u> AAC GGT GAT TAT GCT TGT GTT TAA TCC A | <i>XmaI</i>      |
| Hpt-SO_1327-for       | GTC TAG AGA TGG CCA CAG TTG AAT TAG AGA CAA T            | <i>XbaI</i>      |
| Hpt-SO_1327-rev       | GAT <u>CCC GGG</u> AGG CTT TAG CCT GTA AGA ATT GCT TT    | <i>XmaI</i>      |
| HAMP-SO_3457-for      | GTC TAG AGC TCG AAC AAC ACA GAG CCG C                    | <i>XbaI</i>      |
| Hpt-SO_3457-rev       | GAT <u>CCC GGG</u> ATT AAA GAA GCC CGT TTT TTT GGT CAT C | <i>XmaI</i>      |
| ArcA-SO_3988-KT25-for | GAC <u>CTG CAG</u> TGC AAA ATC CGC ACA TTC TGA TCG       | <i>PstI</i>      |
| ArcA-SO_3988-for      | GAC <u>CTG CAG</u> TAT GCA AAA TCC GCA CAT TCT GAT CG    | <i>PstI</i>      |
| ArcA-SO_3988-rev      | CGG <u>ATC CCA</u> GTC TTC TAA GTT ACC GCA GAA ACG       | <i>BamHI</i>     |
| PAS-arcB-E.coli-for   | GAT <u>CCC GGG</u> AAA GCG CAT CCT GAT ACC GCT T         | <i>XmaI</i>      |
| HisKA-arcB-E.coli-for | GAT <u>CCC GGG</u> ATC ATT TTT TAG TGG CTT TTG CCA CC    | <i>XmaI</i>      |
| Hpt-arcB-E.coli-rev   | GTC TAG AGA CCG AGC GTA AGC GGT ATC AG                   | <i>XbaI</i>      |
