# Supplementary material
Source: PubMed Central journal article supplement (PMC2869118)
Supplement: supp_76_10_3263__2.pdf [file supp_76_10_3263__2.pdf]

Table S2: ArcS/HptA orthologous proteins within the genus *Shewanella*

| Species name                              | ArcS                    |                | HptA                    |                |
|-------------------------------------------|-------------------------|----------------|-------------------------|----------------|
|                                           | identity/<br>similarity | locus name     | identity/<br>similarity | locus name     |
| <i>Shewanella oneidensis</i> MR-1         | 100/100                 | SO_0577        | 100/100                 | SO_1327        |
| <i>Shewanella</i> sp. MR-7                | 98/99                   | ShewMR7_3453   | 97/99                   | ShewMR7_2951   |
| <i>Shewanella</i> sp. MR-4                | 98/99                   | ShewMR4_0577   | 97/99                   | ShewMR4_2826   |
| <i>Shewanella</i> sp. ANA-3               | 98/99                   | Shewana3_0576  | 95/98                   | Shewana3_3047  |
| <i>Shewanella baltica</i> OS223           | 94/97                   | Sbal223_3731   | 88/94                   | Sbal223_3133   |
| <i>Shewanella baltica</i> OS185           | 94/97                   | Shew185_3788   | 88/94                   | Shew185_1224   |
| <i>Shewanella baltica</i> OS195           | 94/97                   | Sbal195_3914   | 88/94                   | Sbal195_1257   |
| <i>Shewanella baltica</i> OS155           | 94/97                   | Sbal_0537      | 88/94                   | Sbal_1180      |
| <i>Shewanella</i> sp. W3-18-1             | 94/97                   | SputW3181_0641 | 89/91                   | SputW3181_3026 |
| <i>Shewanella putrefaciens</i> CN-32      | 94/97                   | SputCN32_3300  | 89/91                   | Sputcn32_1138  |
| <i>Shewanella putrefaciens</i> 200        | 94/97                   | Sput200_2419   | 89/91                   | Sput200_3565   |
| <i>Shewanella sediminis</i> HAW-EB3       | 84/92                   | Ssed_0627      | 82/88                   | Ssed_1128      |
| <i>Shewanella loihica</i> PV-4            | 83/92                   | Shew_0459      | 83/88                   | Shew_1034      |
| <i>Shewanella halifaxensis</i> HAW-EB4    | 84/91                   | Shal_3789      | 84/88                   | Shal_1063      |
| <i>Shewanella amazonensis</i> SB2B        | 84/92                   | Sama_3129      | 78/82                   | Sama_0859      |
| <i>Shewanella pealeana</i> ATCC 700345    | 83/91                   | Spea_3702      | 83/89                   | Spea_1015      |
| <i>Shewanella woodyi</i> ATCC 51908       | 82/91                   | Swoo_4322      | 81/88                   | Swoo_1223      |
| <i>Shewanella piezotolerans</i> WP3       | 82/91                   | Swp_0570       | 83/89                   | Swp_3081       |
| <i>Shewanella frigidimarina</i> NCIMB 400 | 80/90                   | Sfri_3502      | 77/89                   | Sfri_2949      |
| <i>Shewanella denitrificans</i> OS217     | 77/88                   | Sden_0538      | 81/88                   | Sden_2789      |
