# Supplementary material
Source: PubMed Central journal article supplement (PMC2869118)
Supplement: supp_76_10_3263__3.pdf [file supp_76_10_3263__3.pdf]

Table S3: significantly regulated genes in  $\Delta arcS$  mutants under aerobic growth conditions

| ORF     | Gene        | Regulation <sup>1</sup> | Product                                                           | COG description                                                                                                             |
|---------|-------------|-------------------------|-------------------------------------------------------------------|-----------------------------------------------------------------------------------------------------------------------------|
| SO_0003 | <i>trmE</i> | -1.06                   | tRNA modification GTPase TrmE                                     | General function prediction only                                                                                            |
| SO_0017 | -           | 1.22                    | amidohydrolase                                                    | Intracellular trafficking, secretion, and vesicular transport, Secondary metabolites biosynthesis, transport and catabolism |
| SO_0020 | <i>fadA</i> | 1.45                    | 3-ketoacyl-CoA thiolase                                           | Lipid transport and metabolism                                                                                              |
| SO_0027 | -           | 2.04                    | protoporphyrinogen oxidase, putative                              | Energy production and conversion, Coenzyme transport and metabolism                                                         |
| SO_0055 | -           | 1.18                    | hypothetical protein                                              | General function prediction only                                                                                            |
| SO_0075 | -           | -1.36                   | AMP-binding family protein                                        | Lipid transport and metabolism                                                                                              |
| SO_0084 | -           | -1.16                   | HAD-superfamily hydrolase, subfamily IA, variant 1 family protein | Energy production and conversion                                                                                            |
| SO_0086 | -           | -1.47                   | hypothetical protein                                              | Function unknown                                                                                                            |
| SO_0088 | -           | 1.00                    | hypothetical protein                                              | Function unknown                                                                                                            |
| SO_0090 | -           | 3.47                    | hypothetical protein                                              | Function unknown                                                                                                            |
| SO_0094 | -           | -1.07                   | hypothetical protein                                              | Function unknown                                                                                                            |
| SO_0095 | <i>hutI</i> | -1.64                   | imidazolonepropionase                                             | Secondary metabolites biosynthesis, transport and catabolism                                                                |
| SO_0120 | -           | -2.95                   | hypothetical protein                                              | Function unknown                                                                                                            |
| SO_0138 | <i>moeA</i> | 1.07                    | molybdopterin biosynthesis MoeA protein                           | Coenzyme transport and metabolism                                                                                           |
| SO_0151 | -           | -1.20                   | SAM-dependent methyltransferase                                   | Secondary metabolites biosynthesis, transport and catabolism, General function prediction only                              |
| SO_0160 | -           | -1.04                   | transporter, putative                                             | Coenzyme transport and metabolism                                                                                           |
| SO_0166 | <i>gspD</i> | 1.56                    | general secretion pathway protein D                               | Cell motility, Intracellular trafficking, secretion, and vesicular transport                                                |
| SO_0169 | <i>gspG</i> | 1.30                    | general secretion pathway protein G                               | Cell motility, Intracellular trafficking, secretion, and vesicular transport                                                |
| SO_0171 | <i>gspI</i> | 1.07                    | general secretion pathway protein I                               | Cell motility, Intracellular trafficking, secretion, and vesicular transport                                                |
| SO_0172 | <i>gspJ</i> | 1.70                    | general secretion pathway protein J                               | Intracellular trafficking, secretion, and vesicular transport                                                               |
| SO_0174 | <i>gspL</i> | 1.20                    | general secretion pathway protein L                               | Intracellular trafficking, secretion, and vesicular transport                                                               |
| SO_0182 | -           | 1.10                    | hypothetical protein                                              | Function unknown                                                                                                            |
| SO_0184 | -           | 1.44                    | microcystin dependent protein                                     | Function unknown                                                                                                            |
| SO_0185 | -           | 1.17                    | microcystin dependent protein                                     | Function unknown                                                                                                            |
| SO_0186 | -           | 1.17                    | microcystin dependent protein                                     | Function unknown                                                                                                            |
| SO_0187 | -           | 1.31                    | serine protease                                                   | Posttranslational modification, protein turnover, chaperones                                                                |
| SO_0188 | -           | 1.16                    | hypothetical protein                                              | Function unknown                                                                                                            |
| SO_0189 | -           | 1.27                    | fibronectin type III domain-containing protein                    | Secondary metabolites biosynthesis, transport and catabolism                                                                |
| SO_0206 | <i>trmA</i> | -1.02                   | tRNA (uracil-5-)-methyltransferase                                | Translation, ribosomal structure and biogenesis                                                                             |
| SO_0216 | -           | -1.28                   | hypothetical protein                                              | Function unknown                                                                                                            |

Table S3: significantly regulated genes in *ΔarcS* mutants under aerobic growth conditions

| ORF     | Gene          | Regulation <sup>1</sup> | Product                                     | COG description                                                                                                                                      |
|---------|---------------|-------------------------|---------------------------------------------|------------------------------------------------------------------------------------------------------------------------------------------------------|
| SO_0260 | <i>ccmD</i>   | 1.01                    | heme exporter protein CcmD                  | Intracellular trafficking, secretion, and vesicular transport                                                                                        |
| SO_0261 | <i>ccmC</i>   | 1.02                    | heme exporter protein CcmC                  | Posttranslational modification, protein turnover, chaperones                                                                                         |
| SO_0262 | <i>ccmB</i>   | 1.25                    | heme exporter protein CcmB                  | Posttranslational modification, protein turnover, chaperones                                                                                         |
| SO_0263 | <i>ccmA</i>   | 1.79                    | cytochrome c biogenesis protein CcmA        | Posttranslational modification, protein turnover, chaperones                                                                                         |
| SO_0264 | <i>scyA</i>   | -1.10                   | cytochrome c                                | Energy production and conversion                                                                                                                     |
| SO_0265 | -             | 1.57                    | hypothetical protein                        | Posttranslational modification, protein turnover, chaperones                                                                                         |
| SO_0266 | <i>ccmF-1</i> | 1.09                    | cytochrome c-type biogenesis protein CcmF   | Posttranslational modification, protein turnover, chaperones                                                                                         |
| SO_0312 | -             | -3.62                   | outer membrane porin, putative              | Cell wall/membrane/envelope biogenesis                                                                                                               |
| SO_0313 | <i>potE</i>   | -4.21                   | putrescine transporter                      | Amino acid transport and metabolism                                                                                                                  |
| SO_0314 | <i>speF</i>   | -4.35                   | ornithine decarboxylase                     | Amino acid transport and metabolism                                                                                                                  |
| SO_0322 | -             | 1.08                    | hypothetical protein                        | Function unknown                                                                                                                                     |
| SO_0324 | -             | 2.16                    | hypothetical protein                        | Function unknown                                                                                                                                     |
| SO_0325 | -             | 1.18                    | dsrE-related protein                        | Inorganic ion transport and metabolism                                                                                                               |
| SO_0326 | -             | 1.83                    | hypothetical protein                        | Function unknown                                                                                                                                     |
| SO_0334 | -             | 2.36                    | hypothetical protein                        | Function unknown                                                                                                                                     |
| SO_0335 | -             | -2.85                   | hypothetical protein                        | Function unknown                                                                                                                                     |
| SO_0347 | -             | -1.10                   | acyltransferase family protein              | Lipid transport and metabolism                                                                                                                       |
| SO_0354 | -             | -1.21                   | sodium/calcium exchanger                    | Inorganic ion transport and metabolism                                                                                                               |
| SO_0365 | -             | -1.12                   | major facilitator superfamily permease      | Carbohydrate transport and metabolism, Amino acid transport and metabolism, Inorganic ion transport and metabolism, General function prediction only |
| SO_0396 | <i>frdC</i>   | 2.53                    | fumarate reductase cytochrome b-556 subunit | Energy production and conversion                                                                                                                     |
| SO_0397 | <i>frdC</i>   | 1.10                    | fumarate reductase cytochrome B subunit     | Function unknown                                                                                                                                     |
| SO_0403 | -             | -3.63                   | hypothetical protein                        | Energy production and conversion                                                                                                                     |
| SO_0404 | -             | -6.22                   | hypothetical protein                        | Function unknown                                                                                                                                     |
| SO_0468 | <i>ubiA</i>   | -1.09                   | 4-hydroxybenzoate octaprenyltransferase     | Coenzyme transport and metabolism                                                                                                                    |
| SO_0490 | -             | 1.15                    | transcriptional regulator                   | Transcription                                                                                                                                        |
| SO_0504 | <i>fre</i>    | -1.46                   | FMN reductase                               | Coenzyme transport and metabolism, Energy production and conversion                                                                                  |
| SO_0524 | -             | -1.77                   | HlyD family secretion protein               | Defense mechanisms                                                                                                                                   |
| SO_0552 | -             | 2.00                    | hypothetical protein                        | Function unknown                                                                                                                                     |
| SO_0553 | -             | 1.58                    | hypothetical protein                        | Function unknown                                                                                                                                     |
| SO_0556 | -             | -1.61                   | hypothetical protein                        | Function unknown                                                                                                                                     |
| SO_0559 | -             | -1.13                   | MaoC domain-containing protein              | Lipid transport and metabolism                                                                                                                       |

Table S3: significantly regulated genes in  $\Delta arcS$  mutants under aerobic growth conditions

| ORF     | Gene          | Regulation <sup>1</sup> | Product                                                              | COG description                                                                                |
|---------|---------------|-------------------------|----------------------------------------------------------------------|------------------------------------------------------------------------------------------------|
| SO_0562 | -             | -1.18                   | hypothetical protein                                                 | Function unknown                                                                               |
| SO_0563 | -             | -2.80                   | hypothetical protein                                                 | Function unknown                                                                               |
| SO_0569 | -             | 1.22                    | sensory box/GGDEF family protein                                     | Signal transduction mechanisms                                                                 |
| SO_0570 | -             | 1.78                    | response regulator                                                   | Signal transduction mechanisms                                                                 |
| SO_0575 | <i>hepA</i>   | -1.19                   | ATP-dependent helicase HepA                                          | Transcription, Replication, recombination and repair                                           |
| SO_0577 | -             | -1.85                   | sensory box histidine kinase/response regulator                      | Signal transduction mechanisms                                                                 |
| SO_0581 | -             | 3.09                    | hypothetical protein                                                 | Function unknown                                                                               |
| SO_0582 | <i>tpm</i>    | 1.40                    | thiopurine S-methyltransferase                                       | Secondary metabolites biosynthesis, transport and catabolism, General function prediction only |
| SO_0583 | <i>bfd</i>    | -1.61                   | bacterioferritin-associated ferredoxin                               | Inorganic ion transport and metabolism                                                         |
| SO_0588 | -             | -1.12                   | transporter, putative                                                | Cell wall/membrane/envelope biogenesis                                                         |
| SO_0595 | -             | 1.53                    | hypothetical protein                                                 | General function prediction only                                                               |
| SO_0613 | <i>pabA</i>   | -1.09                   | para-aminobenzoate synthase glutamine amidotransferase, component II | Amino acid transport and metabolism, Coenzyme transport and metabolism                         |
| SO_0616 | -             | 1.25                    | esterase, putative                                                   | Lipid transport and metabolism                                                                 |
| SO_0620 | -             | 1.11                    | hypothetical protein                                                 | Function unknown                                                                               |
| SO_0639 | -             | 1.75                    | collagenase family protein                                           | Function unknown                                                                               |
| SO_0671 | -             | 1.32                    | hypothetical protein                                                 | Function unknown                                                                               |
| SO_0672 | -             | 1.22                    | hypothetical protein                                                 | Function unknown                                                                               |
| SO_0696 | <i>dipZ</i>   | 1.20                    | thiol:disulfide interchange protein precursor                        | Posttranslational modification, protein turnover, chaperones, Energy production and conversion |
| SO_0697 | <i>cutA</i>   | 1.57                    | periplasmic divalent cation tolerance protein CutA                   | Inorganic ion transport and metabolism                                                         |
| SO_0702 | -             | -1.36                   | MATE efflux family protein                                           | Defense mechanisms                                                                             |
| SO_0703 | <i>groES</i>  | 1.07                    | co-chaperonin GroES                                                  | Posttranslational modification, protein turnover, chaperones                                   |
| SO_0704 | <i>groEL</i>  | 1.01                    | chaperonin GroEL                                                     | Posttranslational modification, protein turnover, chaperones                                   |
| SO_0717 | -             | 1.11                    | monoheme cytochrome c                                                | Energy production and conversion                                                               |
| SO_0721 | -             | -2.20                   | hypothetical protein                                                 | Function unknown                                                                               |
| SO_0752 | -             | -3.31                   | hypothetical protein                                                 | Function unknown                                                                               |
| SO_0755 | -             | -1.47                   | hypothetical protein                                                 | Function unknown                                                                               |
| SO_0761 | <i>glnB-1</i> | -1.35                   | nitrogen regulatory protein P-II 1                                   | Amino acid transport and metabolism                                                            |
| SO_0775 | -             | -1.63                   | hypothetical protein                                                 | Function unknown                                                                               |
| SO_0785 | -             | -1.43                   | hypothetical protein                                                 | Function unknown                                                                               |
| SO_0788 | -             | -1.51                   | hypothetical protein                                                 | Function unknown                                                                               |
| SO_0797 | -             | 1.10                    | hypothetical protein                                                 | Posttranslational modification, protein turnover, chaperones, Energy production and conversion |

Table S3: significantly regulated genes in  $\Delta arcS$  mutants under aerobic growth conditions

| ORF     | Gene          | Regulation <sup>1</sup> | Product                                              | COG description                                                                                |
|---------|---------------|-------------------------|------------------------------------------------------|------------------------------------------------------------------------------------------------|
| SO_0798 | -             | 1.83                    | hypothetical protein                                 | Inorganic ion transport and metabolism, Coenzyme transport and metabolism                      |
| SO_0806 | -             | 1.86                    | alkaline phosphatase, putative                       | Inorganic ion transport and metabolism                                                         |
| SO_0839 | -             | -1.03                   | LysR family transcriptional regulator                | Transcription                                                                                  |
| SO_0843 | -             | 2.38                    | LysR family transcriptional regulator                | Transcription                                                                                  |
| SO_0844 | -             | -1.90                   | hypothetical protein                                 | Function unknown                                                                               |
| SO_0848 | <i>napA</i>   | 1.79                    | nitrate reductase                                    | Energy production and conversion                                                               |
| SO_0849 | <i>napD</i>   | 2.33                    | napD protein                                         | Inorganic ion transport and metabolism                                                         |
| SO_0850 | -             | -1.59                   | hypothetical protein                                 | Function unknown                                                                               |
| SO_0852 | -             | -1.07                   | hypothetical protein                                 | Function unknown                                                                               |
| SO_0853 | -             | -1.30                   | pilin, putative                                      | Cell motility, Intracellular trafficking, secretion, and vesicular transport                   |
| SO_0858 | -             | -1.65                   | sodium:alanine symporter family protein              | Amino acid transport and metabolism                                                            |
| SO_0863 | -             | -1.18                   | hypothetical protein                                 | Function unknown                                                                               |
| SO_0864 | -             | 2.15                    | LuxR family transcriptional regulator                | Signal transduction mechanisms, Transcription                                                  |
| SO_0865 | -             | 5.02                    | hypothetical protein                                 | Function unknown                                                                               |
| SO_0866 | -             | 6.39                    | minor curlin subunit CsgB, putative                  | Function unknown                                                                               |
| SO_0867 | -             | 3.47                    | serine protease                                      | Posttranslational modification, protein turnover, chaperones, General function prediction only |
| SO_0883 | -             | 1.01                    | hypothetical protein                                 | Function unknown                                                                               |
| SO_0894 | -             | -1.37                   | hypothetical protein                                 | Function unknown                                                                               |
| SO_0900 | -             | 1.14                    | aldo/keto reductase family oxidoreductase            | Energy production and conversion                                                               |
| SO_0902 | <i>nqrA-1</i> | 2.97                    | Na(+)-translocating NADH-quinone reductase subunit A | Energy production and conversion                                                               |
| SO_0903 | <i>nqrB-1</i> | 1.21                    | Na(+)-translocating NADH-quinone reductase subunit B | Energy production and conversion                                                               |
| SO_0904 | <i>nqrC-1</i> | 1.93                    | Na(+)-translocating NADH-quinone reductase subunit C | Energy production and conversion                                                               |
| SO_0906 | <i>nqrE-1</i> | 1.36                    | Na(+)-translocating NADH-quinone reductase subunit E | Energy production and conversion                                                               |
| SO_0916 | -             | 1.28                    | MarR family transcriptional regulator                | Transcription, General function prediction only                                                |
| SO_0918 | <i>aac</i>    | 1.54                    | aculeacin A acylase                                  | General function prediction only                                                               |
| SO_0919 | -             | -1.28                   | serine transporter, putative                         | Amino acid transport and metabolism                                                            |
| SO_0923 | -             | -1.28                   | hypothetical protein                                 | Posttranslational modification, protein turnover, chaperones                                   |
| SO_0940 | -             | 2.37                    | transcriptional regulator-related protein            | Transcription                                                                                  |
| SO_0941 | -             | 3.18                    | hypothetical protein                                 | Function unknown                                                                               |
| SO_0944 | -             | 1.70                    | hypothetical protein                                 | General function prediction only                                                               |
| SO_0945 | -             | 3.80                    | AcrB/AcrD/AcrF family protein                        | Defense mechanisms                                                                             |

Table S3: significantly regulated genes in *ΔarcS* mutants under aerobic growth conditions

| ORF     | Gene        | Regulation <sup>1</sup> | Product                                                   | COG description                                                                                              |
|---------|-------------|-------------------------|-----------------------------------------------------------|--------------------------------------------------------------------------------------------------------------|
| SO_0946 | -           | 4.44                    | hypothetical protein                                      | Cell wall/membrane/envelope biogenesis                                                                       |
| SO_0956 | <i>ahpF</i> | -1.09                   | alkyl hydroperoxide reductase, F subunit                  | Posttranslational modification, protein turnover, chaperones                                                 |
| SO_0961 | -           | -1.35                   | hypothetical protein                                      | Cell wall/membrane/envelope biogenesis                                                                       |
| SO_0970 | -           | 1.15                    | fumarate reductase flavoprotein subunit precursor         | Energy production and conversion                                                                             |
| SO_0974 | -           | -1.51                   | hypothetical protein                                      | Function unknown                                                                                             |
| SO_0994 | -           | 2.14                    | hypothetical protein                                      | Function unknown                                                                                             |
| SO_0999 | <i>pbpG</i> | -1.07                   | D-alanyl-D-alanine endopeptidase                          | Cell wall/membrane/envelope biogenesis                                                                       |
| SO_1064 | -           | 1.21                    | hypothetical protein                                      | General function prediction only                                                                             |
| SO_1066 | -           | 1.35                    | extracellular nuclease                                    | General function prediction only                                                                             |
| SO_1071 | -           | -1.91                   | hypothetical protein                                      | Function unknown                                                                                             |
| SO_1074 | -           | -1.14                   | tyrosine-specific transport protein, putative             | Amino acid transport and metabolism                                                                          |
| SO_1075 | -           | 1.19                    | hypothetical protein                                      | Function unknown                                                                                             |
| SO_1087 | -           | -1.73                   | Na <sup>+</sup> /H <sup>+</sup> antiporter family protein | Energy production and conversion                                                                             |
| SO_1091 | -           | -1.32                   | hypothetical protein                                      | Carbohydrate transport and metabolism, Amino acid transport and metabolism, General function prediction only |
| SO_1092 | -           | -1.02                   | AraC/XylS family transcriptional regulator                | Transcription                                                                                                |
| SO_1094 | -           | -1.80                   | putative transcription elongation factor                  | Transcription                                                                                                |
| SO_1102 | -           | 1.16                    | TonB-dependent receptor domain-containing protein         | Inorganic ion transport and metabolism                                                                       |
| SO_1112 | <i>bfr1</i> | -1.27                   | bacterioferritin subunit 1                                | Inorganic ion transport and metabolism                                                                       |
| SO_1120 | -           | -1.03                   | xanthine/uracil permease family protein                   | General function prediction only                                                                             |
| SO_1126 | <i>dnaK</i> | 1.35                    | chaperone protein DnaK                                    | Posttranslational modification, protein turnover, chaperones                                                 |
| SO_1128 | -           | -1.05                   | hypothetical protein                                      | Function unknown                                                                                             |
| SO_1144 | -           | -1.25                   | methyl-accepting chemotaxis protein                       | Cell motility, Signal transduction mechanisms                                                                |
| SO_1155 | -           | -2.72                   | hypothetical protein                                      | Function unknown                                                                                             |
| SO_1159 | -           | -1.24                   | hypothetical protein                                      | Cell cycle control, cell division, chromosome partitioning                                                   |
| SO_1167 | <i>rodA</i> | -1.04                   | rod shape-determining protein RodA                        | Cell cycle control, cell division, chromosome partitioning                                                   |
| SO_1190 | -           | 1.11                    | hypothetical protein                                      | Inorganic ion transport and metabolism                                                                       |
| SO_1195 | -           | -2.16                   | hypothetical protein                                      | Translation, ribosomal structure and biogenesis                                                              |
| SO_1207 | <i>rpsO</i> | -1.38                   | 30S ribosomal protein S15                                 | Translation, ribosomal structure and biogenesis                                                              |
| SO_1218 | <i>deoA</i> | 1.20                    | thymidine phosphorylase                                   | Nucleotide transport and metabolism                                                                          |
| SO_1268 | -           | 1.09                    | glutamine synthetase                                      | Amino acid transport and metabolism                                                                          |
| SO_1278 | -           | 1.58                    | methyl-accepting chemotaxis protein                       | Cell motility, Signal transduction mechanisms                                                                |

Table S3: significantly regulated genes in  $\Delta arcS$  mutants under aerobic growth conditions

| ORF     | Gene        | Regulation <sup>1</sup> | Product                                               | COG description                                                                                       |
|---------|-------------|-------------------------|-------------------------------------------------------|-------------------------------------------------------------------------------------------------------|
| SO_1279 | -           | 1.01                    | hypothetical protein                                  | Function unknown                                                                                      |
| SO_1281 | -           | -1.18                   | hypothetical protein                                  | Function unknown                                                                                      |
| SO_1297 | <i>gspA</i> | 1.15                    | general secretion pathway protein a                   | Intracellular trafficking, secretion, and vesicular transport, Cell wall/membrane/envelope biogenesis |
| SO_1317 | -           | 1.01                    | hypothetical protein                                  | Function unknown                                                                                      |
| SO_1325 | <i>gltB</i> | 1.30                    | glutamate synthase subunit alpha                      | Amino acid transport and metabolism                                                                   |
| SO_1326 | -           | 1.71                    | hypothetical protein                                  | General function prediction only                                                                      |
| SO_1329 | -           | -1.28                   | adenylate cyclase-related protein                     | Signal transduction mechanisms                                                                        |
| SO_1343 | <i>rseA</i> | 1.39                    | sigma-E factor negative regulatory protein            | Signal transduction mechanisms                                                                        |
| SO_1369 | -           | -1.00                   | hypothetical protein                                  | General function prediction only                                                                      |
| SO_1370 | -           | -1.11                   | hypothetical protein                                  | General function prediction only                                                                      |
| SO_1383 | -           | -1.51                   | DEAD-box ATP dependent DNA helicase                   | Replication, recombination and repair, Transcription, Translation, ribosomal structure and biogenesis |
| SO_1390 | -           | -1.20                   | peptidyl-prolyl cis-trans isomerase, FKBP-type        | Posttranslational modification, protein turnover, chaperones                                          |
| SO_1407 | -           | 1.18                    | mercuric transport periplasmic protein MerP, putative | Inorganic ion transport and metabolism                                                                |
| SO_1415 | -           | 2.36                    | TetR family transcriptional regulator                 | Transcription                                                                                         |
| SO_1416 | -           | 1.44                    | DNA-binding response regulator                        | Signal transduction mechanisms                                                                        |
| SO_1417 | -           | 1.01                    | sensor histidine kinase                               | Signal transduction mechanisms                                                                        |
| SO_1443 | -           | -1.32                   | hypothetical protein                                  | Function unknown                                                                                      |
| SO_1469 | -           | -1.12                   | Cro/CI family transcriptional regulator               | Transcription                                                                                         |
| SO_1478 | -           | 3.14                    | methylase, putative                                   | Coenzyme transport and metabolism                                                                     |
| SO_1479 | -           | 2.84                    | hypothetical protein                                  | Function unknown                                                                                      |
| SO_1480 | -           | 1.31                    | GGDEF family protein                                  | Signal transduction mechanisms                                                                        |
| SO_1483 | <i>aceB</i> | 1.83                    | malate synthase                                       | Energy production and conversion                                                                      |
| SO_1484 | <i>aceA</i> | 1.84                    | isocitrate lyase                                      | Energy production and conversion                                                                      |
| SO_1506 | -           | -1.19                   | MATE efflux family protein                            | Defense mechanisms                                                                                    |
| SO_1507 | -           | -1.30                   | hypothetical protein                                  | Function unknown                                                                                      |
| SO_1508 | -           | -1.08                   | hypothetical protein                                  | Amino acid transport and metabolism                                                                   |
| SO_1512 | -           | -1.37                   | hypothetical protein                                  | Energy production and conversion                                                                      |
| SO_1513 | -           | -1.73                   | hypothetical protein                                  | Nucleotide transport and metabolism                                                                   |
| SO_1543 | -           | -1.18                   | hypothetical protein                                  | Function unknown                                                                                      |
| SO_1568 | -           | -2.90                   | hypothetical protein                                  | Function unknown                                                                                      |
| SO_1572 | -           | -1.94                   | hypothetical protein                                  | Function unknown                                                                                      |

Table S3: significantly regulated genes in  $\Delta arcS$  mutants under aerobic growth conditions

| ORF     | Gene        | Regulation <sup>1</sup> | Product                                             | COG description                                              |
|---------|-------------|-------------------------|-----------------------------------------------------|--------------------------------------------------------------|
| SO_1581 | <i>phnA</i> | -1.36                   | phnA protein                                        | Inorganic ion transport and metabolism                       |
| SO_1589 | -           | 1.23                    | hypothetical protein                                | Function unknown                                             |
| SO_1591 | -           | 1.74                    | hypothetical protein                                | Function unknown                                             |
| SO_1635 | <i>dxr</i>  | 1.15                    | 1-deoxy-D-xylulose 5-phosphate reductoisomerase     | Lipid transport and metabolism                               |
| SO_1643 | <i>rnhB</i> | 1.09                    | ribonuclease HII                                    | Replication, recombination and repair                        |
| SO_1649 | -           | 1.87                    | hypothetical protein                                | Function unknown                                             |
| SO_1650 | -           | 1.47                    | hypothetical protein                                | Function unknown                                             |
| SO_1666 | <i>phhA</i> | 2.84                    | phenylalanine 4-monooxygenase                       | Amino acid transport and metabolism                          |
| SO_1667 | <i>phhB</i> | 2.55                    | pterin-4-alpha-carbinolamine dehydratase            | Coenzyme transport and metabolism                            |
| SO_1673 | -           | 2.10                    | outer membrane protein W                            | Cell wall/membrane/envelope biogenesis                       |
| SO_1678 | <i>mmsA</i> | 1.08                    | methylmalonate-semialdehyde dehydrogenase           | Energy production and conversion                             |
| SO_1698 | -           | 2.43                    | hypothetical protein                                | Function unknown                                             |
| SO_1700 | -           | 3.05                    | hypothetical protein                                | Function unknown                                             |
| SO_1701 | -           | 3.26                    | hypothetical protein                                | Function unknown                                             |
| SO_1708 | <i>cat2</i> | 1.02                    | 4-hydroxybutyrate coenzyme A transferase            | Energy production and conversion                             |
| SO_1710 | -           | 1.15                    | hypothetical protein                                | Function unknown                                             |
| SO_1751 | -           | 1.06                    | hypothetical protein                                | Amino acid transport and metabolism                          |
| SO_1759 | -           | -1.07                   | hypothetical protein                                | Function unknown                                             |
| SO_1769 | -           | -1.43                   | glutamate decarboxylase, putative                   | Amino acid transport and metabolism                          |
| SO_1770 | -           | 1.66                    | glycerate kinase, putative                          | Carbohydrate transport and metabolism                        |
| SO_1775 | -           | -1.25                   | phage SPO1 DNA polymerase domain-containing protein | Replication, recombination and repair                        |
| SO_1796 | <i>lon</i>  | 1.43                    | ATP-dependent protease La                           | Posttranslational modification, protein turnover, chaperones |
| SO_1806 | <i>pspF</i> | 1.93                    | psp operon transcriptional activator                | Transcription, Signal transduction mechanisms                |
| SO_1812 | <i>mdeA</i> | 2.65                    | methionine gamma-lyase                              | Amino acid transport and metabolism                          |
| SO_1813 | -           | 1.68                    | DNA-binding protein, putative                       | Replication, recombination and repair                        |
| SO_1821 | -           | -2.19                   | outer membrane porin, putative                      | Cell wall/membrane/envelope biogenesis                       |
| SO_1822 | -           | 3.79                    | TonB-dependent receptor, putative                   | Inorganic ion transport and metabolism                       |
| SO_1835 | -           | -1.31                   | hypothetical protein                                | Function unknown                                             |
| SO_1836 | -           | -1.40                   | hypothetical protein                                | Function unknown                                             |
| SO_1844 | -           | 1.31                    | extracellular nuclease, putative                    | General function prediction only                             |
| SO_1858 | -           | -4.16                   | hypothetical protein                                | Function unknown                                             |

Table S3: significantly regulated genes in  $\Delta arcS$  mutants under aerobic growth conditions

| ORF     | Gene        | Regulation <sup>1</sup> | Product                                                   | COG description                                                                                                                |
|---------|-------------|-------------------------|-----------------------------------------------------------|--------------------------------------------------------------------------------------------------------------------------------|
| SO_1863 | -           | -1.71                   | HU family DNA-binding protein                             | Replication, recombination and repair                                                                                          |
| SO_1881 | -           | 1.16                    | HlyD family-like protein                                  | Cell wall/membrane/envelope biogenesis                                                                                         |
| SO_1888 | -           | 1.01                    | hypothetical protein                                      | Function unknown                                                                                                               |
| SO_1895 | -           | 1.12                    | enoyl-CoA hydratase/isomerase family protein              | Lipid transport and metabolism                                                                                                 |
| SO_1901 | <i>sugE</i> | -1.16                   | sugE protein                                              | Inorganic ion transport and metabolism                                                                                         |
| SO_1909 | -           | 1.01                    | hypothetical protein                                      | Function unknown                                                                                                               |
| SO_1911 | -           | 2.97                    | short chain dehydrogenase/reductase family oxidoreductase | Lipid transport and metabolism, Secondary metabolites biosynthesis, transport and catabolism, General function prediction only |
| SO_1915 | -           | 2.51                    | serine protease                                           | Posttranslational modification, protein turnover, chaperones, General function prediction only                                 |
| SO_1921 | -           | -2.12                   | hypothetical protein                                      | Function unknown                                                                                                               |
| SO_1961 | <i>maa</i>  | -1.08                   | maltose O-acetyltransferase                               | General function prediction only                                                                                               |
| SO_1962 | -           | 1.39                    | 4-hydroxyphenylpyruvate dioxygenase                       | Amino acid transport and metabolism, General function prediction only                                                          |
| SO_1963 | -           | 1.87                    | hypothetical protein                                      | Secondary metabolites biosynthesis, transport and catabolism                                                                   |
| SO_1964 | -           | 1.16                    | hypothetical protein                                      | Function unknown                                                                                                               |
| SO_1985 | -           | -1.80                   | transcriptional activator, putative                       | Signal transduction mechanisms                                                                                                 |
| SO_1986 | -           | -1.91                   | RNA polymerase sigma-70 factor                            | Transcription                                                                                                                  |
| SO_1987 | -           | -1.35                   | ATP-dependent protease La                                 | General function prediction only                                                                                               |
| SO_2004 | -           | -1.92                   | TonB-dependent receptor domain-containing protein         | Inorganic ion transport and metabolism                                                                                         |
| SO_2010 | -           | -1.67                   | hypothetical protein                                      | Function unknown                                                                                                               |
| SO_2011 | -           | -1.22                   | hypothetical protein                                      | Function unknown                                                                                                               |
| SO_2016 | <i>htpG</i> | 1.88                    | heat shock protein 90                                     | Posttranslational modification, protein turnover, chaperones                                                                   |
| SO_2017 | -           | 2.90                    | thioredoxin-like protein                                  | Posttranslational modification, protein turnover, chaperones                                                                   |
| SO_2042 | -           | 1.11                    | putative sulfite oxidase subunit YedY                     | General function prediction only                                                                                               |
| SO_2044 | <i>gloA</i> | -1.39                   | lactoylglutathione lyase                                  | Amino acid transport and metabolism                                                                                            |
| SO_2047 | -           | 1.13                    | prolyl oligopeptidase family protein                      | Amino acid transport and metabolism                                                                                            |
| SO_2049 | -           | 1.12                    | GGDEF family protein                                      | Signal transduction mechanisms                                                                                                 |
| SO_2065 | <i>tyrP</i> | -1.20                   | tyrosine-specific transport protein                       | Amino acid transport and metabolism                                                                                            |
| SO_2083 | -           | 1.61                    | methyl-accepting chemotaxis protein                       | Cell motility, Signal transduction mechanisms                                                                                  |
| SO_2090 | <i>hypE</i> | 1.33                    | hydrogenase expression/formation protein HypE             | Posttranslational modification, protein turnover, chaperones                                                                   |
| SO_2091 | <i>hypD</i> | 3.30                    | hydrogenase expression/formation protein HypD             | Posttranslational modification, protein turnover, chaperones                                                                   |
| SO_2092 | <i>hypC</i> | 2.38                    | hydrogenase assembly chaperone hypC/hupF                  | Posttranslational modification, protein turnover, chaperones                                                                   |
| SO_2093 | <i>hypB</i> | 2.37                    | hydrogenase accessory protein HypB                        | Posttranslational modification, protein turnover, chaperones, Transcription                                                    |



Table S3: significantly regulated genes in  $\Delta arcS$  mutants under aerobic growth conditions

| ORF     | Gene        | Regulation <sup>1</sup> | Product                                                     | COG description                                                                                                                                      |
|---------|-------------|-------------------------|-------------------------------------------------------------|------------------------------------------------------------------------------------------------------------------------------------------------------|
| SO_2096 | -           | 1.63                    | hydrogenase expression/formation protein                    | Energy production and conversion                                                                                                                     |
| SO_2097 | <i>hydC</i> | 1.50                    | quinone-reactive Ni/Fe hydrogenase, cytochrome b subunit    | Energy production and conversion                                                                                                                     |
| SO_2098 | <i>hyaB</i> | 3.88                    | quinone-reactive Ni/Fe hydrogenase, large subunit           | Energy production and conversion                                                                                                                     |
| SO_2099 | <i>hoxK</i> | 3.81                    | quinone-reactive Ni/Fe hydrogenase, small subunit precursor | Energy production and conversion                                                                                                                     |
| SO_2109 | -           | 1.90                    | hypothetical protein                                        | Function unknown                                                                                                                                     |
| SO_2110 | -           | 1.47                    | hypothetical protein                                        | Function unknown                                                                                                                                     |
| SO_2111 | -           | -1.44                   | hypothetical protein                                        | Function unknown                                                                                                                                     |
| SO_2113 | -           | -1.23                   | hypothetical protein                                        | Function unknown                                                                                                                                     |
| SO_2114 | -           | -1.03                   | hypothetical protein                                        | Cell wall/membrane/envelope biogenesis                                                                                                               |
| SO_2123 | -           | 1.30                    | methyl-accepting chemotaxis protein                         | Cell motility, Signal transduction mechanisms                                                                                                        |
| SO_2167 | -           | 1.14                    | hypothetical protein                                        | Energy production and conversion                                                                                                                     |
| SO_2191 | <i>metC</i> | -1.04                   | cystathionine beta-lyase                                    | Amino acid transport and metabolism                                                                                                                  |
| SO_2192 | -           | -1.12                   | sensor histidine kinase                                     | Signal transduction mechanisms                                                                                                                       |
| SO_2203 | <i>dgkA</i> | -1.18                   | diacylglycerol kinase                                       | Cell wall/membrane/envelope biogenesis                                                                                                               |
| SO_2215 | -           | -1.17                   | sun protein, putative                                       | Translation, ribosomal structure and biogenesis                                                                                                      |
| SO_2216 | -           | 1.34                    | sensory box protein                                         | Signal transduction mechanisms                                                                                                                       |
| SO_2241 | -           | 1.14                    | hypothetical protein                                        | Function unknown                                                                                                                                     |
| SO_2251 | -           | 1.10                    | hypothetical protein                                        | General function prediction only                                                                                                                     |
| SO_2253 | -           | -1.55                   | acylphosphatase                                             | Energy production and conversion                                                                                                                     |
| SO_2260 | <i>suhB</i> | -1.79                   | extragenic suppressor protein SuhB                          | Carbohydrate transport and metabolism                                                                                                                |
| SO_2279 | <i>ilvI</i> | 1.11                    | acetolactate synthase 3 catalytic subunit                   | Amino acid transport and metabolism, Coenzyme transport and metabolism                                                                               |
| SO_2354 | -           | -1.33                   | hypothetical protein                                        | Cell cycle control, cell division, chromosome partitioning                                                                                           |
| SO_2373 | -           | -1.16                   | inner membrane transport protein YdhC                       | Carbohydrate transport and metabolism, Amino acid transport and metabolism, Inorganic ion transport and metabolism, General function prediction only |
| SO_2389 | <i>emrD</i> | -3.55                   | multidrug resistance protein D                              | Carbohydrate transport and metabolism, Amino acid transport and metabolism, Inorganic ion transport and metabolism, General function prediction only |
| SO_2394 | <i>dacB</i> | 1.23                    | penicillin-binding protein 4                                | Cell wall/membrane/envelope biogenesis                                                                                                               |
| SO_2395 | -           | 1.85                    | acyl-CoA dehydrogenase family protein                       | Lipid transport and metabolism                                                                                                                       |
| SO_2399 | -           | -1.04                   | hypothetical protein                                        | Carbohydrate transport and metabolism                                                                                                                |
| SO_2426 | -           | 1.48                    | DNA-binding response regulator                              | Signal transduction mechanisms, Transcription                                                                                                        |
| SO_2427 | -           | -4.79                   | TonB-dependent receptor, putative                           | Inorganic ion transport and metabolism                                                                                                               |
| SO_2446 | -           | 2.69                    | hypothetical protein                                        | Function unknown                                                                                                                                     |

Table S3: significantly regulated genes in  $\Delta arcS$  mutants under aerobic growth conditions

| ORF     | Gene          | Regulation <sup>1</sup> | Product                                                          | COG description                                                                                     |
|---------|---------------|-------------------------|------------------------------------------------------------------|-----------------------------------------------------------------------------------------------------|
| SO_2483 | -             | -2.38                   | aminotransferase AlaT                                            | Amino acid transport and metabolism                                                                 |
| SO_2490 | -             | 1.04                    | DNA-binding transcriptional regulator HexR                       | Transcription                                                                                       |
| SO_2493 | -             | 1.34                    | TetR family transcriptional regulator                            | Transcription                                                                                       |
| SO_2515 | -             | -1.02                   | hypothetical protein                                             | Function unknown                                                                                    |
| SO_2516 | -             | -1.97                   | hypothetical protein                                             | Function unknown                                                                                    |
| SO_2525 | -             | -1.11                   | ABC transporter, ATP-binding protein                             | General function prediction only                                                                    |
| SO_2530 | <i>def</i>    | -1.38                   | peptide deformylase                                              | Translation, ribosomal structure and biogenesis                                                     |
| SO_2566 | <i>asmA</i>   | 1.51                    | asmA protein                                                     | Cell wall/membrane/envelope biogenesis                                                              |
| SO_2569 | -             | -2.21                   | hypothetical protein                                             | Function unknown                                                                                    |
| SO_2570 | -             | 1.71                    | putative lipoprotein                                             | Function unknown                                                                                    |
| SO_2587 | <i>hemB-1</i> | 2.02                    | delta-aminolevulinic acid dehydratase                            | Coenzyme transport and metabolism                                                                   |
| SO_2594 | -             | 1.91                    | hypothetical protein                                             | General function prediction only                                                                    |
| SO_2595 | -             | 3.88                    | BNR repeat-containing protein                                    | General function prediction only                                                                    |
| SO_2596 | -             | 3.50                    | hypothetical protein                                             | Function unknown                                                                                    |
| SO_2597 | -             | 4.16                    | hypothetical protein                                             | Function unknown                                                                                    |
| SO_2625 | <i>infA</i>   | -1.63                   | translation initiation factor IF-1                               | Translation, ribosomal structure and biogenesis                                                     |
| SO_2628 | <i>cspD</i>   | 2.81                    | stress response protein CspD                                     | Transcription                                                                                       |
| SO_2647 | -             | -1.61                   | cytosolic long-chain acyl-CoA thioester hydrolase family protein | Lipid transport and metabolism                                                                      |
| SO_2653 | -             | -2.33                   | Ner family transcriptional regulator                             | Transcription                                                                                       |
| SO_2654 | -             | -2.42                   | transposase, putative                                            | Replication, recombination and repair                                                               |
| SO_2657 | -             | -1.79                   | hypothetical protein                                             | Function unknown                                                                                    |
| SO_2658 | -             | -1.62                   | hypothetical protein                                             | Function unknown                                                                                    |
| SO_2660 | -             | -1.75                   | hypothetical protein                                             | Function unknown                                                                                    |
| SO_2661 | -             | -1.43                   | hypothetical protein                                             | Function unknown                                                                                    |
| SO_2663 | -             | -1.69                   | hypothetical protein                                             | Function unknown                                                                                    |
| SO_2665 | -             | -1.72                   | hypothetical protein                                             | Function unknown                                                                                    |
| SO_2682 | -             | -1.10                   | hypothetical protein                                             | Function unknown                                                                                    |
| SO_2683 | -             | -1.27                   | hypothetical protein                                             | Function unknown                                                                                    |
| SO_2711 | -             | 1.59                    | hypothetical protein                                             | Function unknown                                                                                    |
| SO_2727 | -             | -1.17                   | cytochrome c3                                                    | Replication, recombination and repair, Posttranslational modification, protein turnover, chaperones |
| SO_2745 | <i>grxA</i>   | -1.88                   | glutaredoxin 1                                                   | Posttranslational modification, protein turnover, chaperones                                        |

Table S3: significantly regulated genes in  $\Delta arcS$  mutants under aerobic growth conditions

| ORF     | Gene        | Regulation <sup>1</sup> | Product                                             | COG description                                                                                                             |
|---------|-------------|-------------------------|-----------------------------------------------------|-----------------------------------------------------------------------------------------------------------------------------|
| SO_2751 | -           | 1.00                    | MotA/TolQ/ExbB proton channel family protein        | Intracellular trafficking, secretion, and vesicular transport                                                               |
| SO_2755 | <i>mt</i>   | -1.38                   | ribonuclease T                                      | Replication, recombination and repair                                                                                       |
| SO_2797 | -           | -2.64                   | hypothetical protein                                | Posttranslational modification, protein turnover, chaperones                                                                |
| SO_2801 | <i>lpxK</i> | -1.10                   | tetraacyldisaccharide 4'-kinase                     | Cell wall/membrane/envelope biogenesis                                                                                      |
| SO_2849 | -           | -1.37                   | acetyltransferase                                   | Transcription, General function prediction only                                                                             |
| SO_2850 | -           | -1.02                   | acetyltransferase                                   | Translation, ribosomal structure and biogenesis                                                                             |
| SO_2856 | -           | 1.41                    | CBS domain-containing protein                       | Signal transduction mechanisms                                                                                              |
| SO_2857 | -           | 1.86                    | sodium/solute symporter family protein              | General function prediction only                                                                                            |
| SO_2858 | -           | 1.45                    | hypothetical protein                                | Function unknown                                                                                                            |
| SO_2861 | -           | -1.03                   | hypothetical protein                                | Cell wall/membrane/envelope biogenesis, Carbohydrate transport and metabolism                                               |
| SO_2863 | -           | -1.07                   | hypothetical protein                                | Function unknown                                                                                                            |
| SO_2865 | -           | -1.56                   | L-lysine exporter, putative                         | General function prediction only                                                                                            |
| SO_2868 | -           | -1.36                   | hypothetical protein                                | Posttranslational modification, protein turnover, chaperones                                                                |
| SO_2888 | -           | 1.50                    | hypothetical protein                                | Function unknown                                                                                                            |
| SO_2889 | -           | 1.12                    | sensory box histidine kinase                        | Signal transduction mechanisms, Cell motility                                                                               |
| SO_2905 | -           | 1.09                    | O-methyltransferase, putative                       | Secondary metabolites biosynthesis, transport and catabolism, General function prediction only                              |
| SO_2913 | <i>pflA</i> | 1.84                    | pyruvate formate lyase-activating enzyme 1          | Posttranslational modification, protein turnover, chaperones                                                                |
| SO_2918 | -           | -1.98                   | hypothetical protein                                | Function unknown                                                                                                            |
| SO_2923 | <i>gltS</i> | -1.20                   | sodium/glutamate symporter                          | Amino acid transport and metabolism                                                                                         |
| SO_2924 | -           | 1.43                    | signal peptidase I family protein                   | Intracellular trafficking, secretion, and vesicular transport                                                               |
| SO_2926 | -           | 1.69                    | ABC transporter, permease, putative                 | Secondary metabolites biosynthesis, transport and catabolism                                                                |
| SO_2927 | -           | 2.92                    | ABC transporter, ATP-binding protein                | Secondary metabolites biosynthesis, transport and catabolism                                                                |
| SO_2934 | -           | 3.71                    | hypothetical protein                                | General function prediction only                                                                                            |
| SO_2945 | -           | 2.15                    | hypothetical protein                                | Function unknown                                                                                                            |
| SO_2954 | -           | 1.87                    | hypothetical protein                                | Function unknown                                                                                                            |
| SO_2955 | -           | 1.64                    | hypothetical protein                                | Function unknown                                                                                                            |
| SO_2960 | -           | 1.16                    | hypothetical protein                                | Function unknown                                                                                                            |
| SO_2962 | -           | 1.20                    | hypothetical protein                                | Function unknown                                                                                                            |
| SO_2963 | -           | 1.19                    | prophage LambdaSo, HK97 family major capsid protein | Function unknown                                                                                                            |
| SO_2964 | -           | 1.28                    | ClpP protease family protein                        | Posttranslational modification, protein turnover, chaperones, Intracellular trafficking, secretion, and vesicular transport |
| SO_2968 | -           | 1.05                    | phage terminase small subunit                       | Replication, recombination and repair                                                                                       |

Table S3: significantly regulated genes in  $\Delta arcS$  mutants under aerobic growth conditions

| ORF     | Gene        | Regulation <sup>1</sup> | Product                                                   | COG description                                              |
|---------|-------------|-------------------------|-----------------------------------------------------------|--------------------------------------------------------------|
| SO_2974 | -           | 1.84                    | hypothetical protein                                      | Function unknown                                             |
| SO_2977 | -           | -1.67                   | hypothetical protein                                      | Function unknown                                             |
| SO_2988 | -           | -1.30                   | hypothetical protein                                      | Function unknown                                             |
| SO_2999 | -           | -1.06                   | hypothetical protein                                      | Function unknown                                             |
| SO_3029 | -           | -1.11                   | hypothetical protein                                      | Function unknown                                             |
| SO_3030 | <i>alcA</i> | 3.38                    | siderophore biosynthesis protein                          | Secondary metabolites biosynthesis, transport and catabolism |
| SO_3031 | -           | 1.34                    | siderophore biosynthesis protein, putative                | Translation, ribosomal structure and biogenesis              |
| SO_3032 | -           | 1.18                    | siderophore biosynthesis protein, putative                | Secondary metabolites biosynthesis, transport and catabolism |
| SO_3033 | -           | 1.40                    | ferric alcaligin siderophore receptor                     | Inorganic ion transport and metabolism                       |
| SO_3047 | -           | 1.18                    | hypothetical protein                                      | Function unknown                                             |
| SO_3048 | -           | 1.24                    | isoquinoline 1-oxidoreductase, beta subunit, putative     | Energy production and conversion                             |
| SO_3051 | -           | 1.01                    | xanthine dehydrogenase accessory factor                   | Posttranslational modification, protein turnover, chaperones |
| SO_3053 | -           | 1.37                    | hypothetical protein                                      | Function unknown                                             |
| SO_3054 | -           | 1.35                    | metallo-beta-lactamase family protein                     | General function prediction only                             |
| SO_3059 | -           | 1.91                    | formate hydrogenlyase transcriptional activator, putative | Transcription, Signal transduction mechanisms                |
| SO_3060 | -           | -1.19                   | outer membrane porin, putative                            | Cell wall/membrane/envelope biogenesis                       |
| SO_3063 | -           | 1.29                    | sodium:alanine symporter family protein                   | Amino acid transport and metabolism                          |
| SO_3090 | -           | 1.69                    | MoxR domain-containing protein                            | General function prediction only                             |
| SO_3091 | -           | 1.85                    | hypothetical protein                                      | General function prediction only                             |
| SO_3092 | -           | 1.45                    | hypothetical protein                                      | Function unknown                                             |
| SO_3093 | -           | 1.36                    | von Willebrand factor type A domain-containing protein    | General function prediction only                             |
| SO_3094 | -           | 1.60                    | TPR domain-containing protein                             | General function prediction only                             |
| SO_3095 | -           | 1.07                    | hypothetical protein                                      | Function unknown                                             |
| SO_3099 | -           | -6.40                   | long-chain fatty acid transport protein, putative         | Lipid transport and metabolism                               |
| SO_3101 | -           | 1.13                    | hypothetical protein                                      | Function unknown                                             |
| SO_3102 | -           | 1.07                    | AcrA/AcrE family protein                                  | Cell wall/membrane/envelope biogenesis                       |
| SO_3106 | <i>aprE</i> | 4.16                    | cold-active serine alkaline protease                      | Posttranslational modification, protein turnover, chaperones |
| SO_3122 | -           | -1.47                   | serine/threonine transporter SstT                         | Amino acid transport and metabolism                          |
| SO_3132 | -           | -2.77                   | hypothetical protein                                      | Function unknown                                             |
| SO_3135 | -           | -1.33                   | C4-dicarboxylate transporter, putative                    | Carbohydrate transport and metabolism                        |
| SO_3136 | <i>dctM</i> | -1.24                   | C4-dicarboxylate transport protein                        | Carbohydrate transport and metabolism                        |

Table S3: significantly regulated genes in  $\Delta arcS$  mutants under aerobic growth conditions

| ORF     | Gene          | Regulation <sup>1</sup> | Product                                                   | COG description                                                                                                                |
|---------|---------------|-------------------------|-----------------------------------------------------------|--------------------------------------------------------------------------------------------------------------------------------|
| SO_3145 | <i>etfB</i>   | 1.33                    | electron transfer flavoprotein, beta subunit              | Energy production and conversion                                                                                               |
| SO_3161 | -             | -1.15                   | glucose-1-phosphate thymidyltransferase-related protein   | Cell wall/membrane/envelope biogenesis                                                                                         |
| SO_3275 | -             | -1.92                   | hypothetical protein                                      | Function unknown                                                                                                               |
| SO_3279 | -             | 1.80                    | AcrB/AcrD/AcrF family protein                             | Defense mechanisms                                                                                                             |
| SO_3301 | -             | -1.23                   | flavocytochrome c flavin subunit                          | Energy production and conversion                                                                                               |
| SO_3305 | -             | -1.86                   | LuxR family DNA-binding response regulator                | Signal transduction mechanisms, Transcription                                                                                  |
| SO_3342 | -             | -1.71                   | hypothetical protein                                      | Function unknown                                                                                                               |
| SO_3350 | <i>pilU</i>   | 1.79                    | twitching motility protein PilU                           | Cell motility, Intracellular trafficking, secretion, and vesicular transport                                                   |
| SO_3351 | <i>pilT</i>   | 1.79                    | twitching motility protein PilT                           | Cell motility, Intracellular trafficking, secretion, and vesicular transport                                                   |
| SO_3377 | -             | -1.22                   | hypothetical protein                                      | Function unknown                                                                                                               |
| SO_3378 | -             | -1.22                   | hypothetical protein                                      | Function unknown                                                                                                               |
| SO_3380 | -             | -1.24                   | hypothetical protein                                      | Function unknown                                                                                                               |
| SO_3381 | -             | -1.34                   | hypothetical protein                                      | General function prediction only                                                                                               |
| SO_3382 | -             | -1.69                   | short chain dehydrogenase/reductase family oxidoreductase | Lipid transport and metabolism, Secondary metabolites biosynthesis, transport and catabolism, General function prediction only |
| SO_3383 | -             | -1.74                   | transcriptional regulator-related protein                 | Function unknown                                                                                                               |
| SO_3386 | -             | -1.05                   | hypothetical protein                                      | Function unknown                                                                                                               |
| SO_3395 | -             | 2.61                    | hypothetical protein                                      | Function unknown                                                                                                               |
| SO_3403 | <i>yfiA-1</i> | 1.41                    | ribosomal subunit interface protein                       | Translation, ribosomal structure and biogenesis                                                                                |
| SO_3404 | -             | 1.23                    | methyl-accepting chemotaxis protein                       | Cell motility, Signal transduction mechanisms                                                                                  |
| SO_3408 | -             | 1.11                    | hypothetical protein                                      | Function unknown                                                                                                               |
| SO_3418 | -             | -1.07                   | hypothetical protein                                      | Function unknown                                                                                                               |
| SO_3422 | <i>yfiA-2</i> | 2.20                    | ribosomal subunit interface protein                       | Translation, ribosomal structure and biogenesis                                                                                |
| SO_3432 | <i>rpoS</i>   | 2.02                    | RNA polymerase sigma-38 factor                            | Transcription                                                                                                                  |
| SO_3433 | <i>nlpD</i>   | 2.26                    | lipoprotein NlpD                                          | Cell wall/membrane/envelope biogenesis                                                                                         |
| SO_3469 | <i>ribD</i>   | 1.05                    | riboflavin biosynthesis protein RibD                      | Coenzyme transport and metabolism                                                                                              |
| SO_3480 | -             | 1.20                    | phosphatase                                               | Signal transduction mechanisms                                                                                                 |
| SO_3489 | -             | 3.06                    | GGDEF domain-containing protein                           | Signal transduction mechanisms                                                                                                 |
| SO_3507 | -             | 1.08                    | hypothetical protein                                      | Carbohydrate transport and metabolism                                                                                          |
| SO_3514 | -             | 1.08                    | TonB-dependent receptor                                   | Inorganic ion transport and metabolism                                                                                         |
| SO_3527 | -             | 1.05                    | hypothetical protein                                      | Cell motility, Intracellular trafficking, secretion, and vesicular transport                                                   |
| SO_3537 | <i>rpsT</i>   | -1.75                   | 30S ribosomal protein S20                                 | Translation, ribosomal structure and biogenesis                                                                                |

Table S3: significantly regulated genes in  $\Delta arcS$  mutants under aerobic growth conditions

| ORF     | Gene        | Regulation <sup>1</sup> | Product                                                                          | COG description                                                       |
|---------|-------------|-------------------------|----------------------------------------------------------------------------------|-----------------------------------------------------------------------|
| SO_3538 | <i>hlyU</i> | 1.25                    | transcriptional regulator HlyU                                                   | Transcription                                                         |
| SO_3540 | -           | -1.16                   | hypothetical protein                                                             | Function unknown                                                      |
| SO_3542 | -           | 1.44                    | putative phosphoketolase                                                         | Carbohydrate transport and metabolism                                 |
| SO_3558 | -           | 1.32                    | hypothetical protein                                                             | Function unknown                                                      |
| SO_3559 | <i>gshA</i> | 1.33                    | glutamate--cysteine ligase                                                       | Coenzyme transport and metabolism                                     |
| SO_3560 | -           | 2.53                    | M16 family peptidase                                                             | General function prediction only                                      |
| SO_3562 | -           | -1.56                   | proton/glutamate symporter, putative                                             | Energy production and conversion                                      |
| SO_3573 | -           | -1.52                   | hypothetical protein                                                             | Function unknown                                                      |
| SO_3577 | <i>clpB</i> | 1.08                    | clpB protein                                                                     | Posttranslational modification, protein turnover, chaperones          |
| SO_3582 | -           | -1.33                   | methyl-accepting chemotaxis protein                                              | Cell motility, Signal transduction mechanisms                         |
| SO_3611 | -           | 1.24                    | AAA family ATPase                                                                | Posttranslational modification, protein turnover, chaperones          |
| SO_3627 | -           | 1.65                    | TetR family transcriptional regulator                                            | Transcription                                                         |
| SO_3638 | <i>pdxA</i> | 1.02                    | pyridoxal phosphate biosynthetic protein PdxA                                    | Coenzyme transport and metabolism                                     |
| SO_3656 | -           | -1.43                   | hypothetical protein                                                             | Function unknown                                                      |
| SO_3657 | -           | -1.25                   | amino acid transporter LysE                                                      | Amino acid transport and metabolism                                   |
| SO_3668 | -           | 1.27                    | hypothetical protein                                                             | Inorganic ion transport and metabolism                                |
| SO_3679 | -           | 1.05                    | hypothetical protein                                                             | Function unknown                                                      |
| SO_3685 | -           | 2.13                    | curli production assembly/transport component CsgG, putative                     | Cell wall/membrane/envelope biogenesis                                |
| SO_3686 | -           | 1.57                    | curli production assembly/transport component CsgF, putative                     | Function unknown                                                      |
| SO_3687 | -           | 3.42                    | curli production assembly/transport component CsgE, putative                     | Function unknown                                                      |
| SO_3688 | -           | 1.26                    | nitrogen regulation protein NtrY, putative                                       | Signal transduction mechanisms                                        |
| SO_3689 | -           | 1.30                    | sigma-54 dependent nitrogen response regulator                                   | Signal transduction mechanisms                                        |
| SO_3705 | -           | -2.68                   | 5-methylthioadenosine nucleosidase/S-adenosylhomocysteine nucleosidase, putative | Nucleotide transport and metabolism                                   |
| SO_3706 | -           | -3.53                   | NupC family protein                                                              | Nucleotide transport and metabolism                                   |
| SO_3715 | -           | -1.00                   | dihydropteridine reductase                                                       | Energy production and conversion                                      |
| SO_3720 | -           | 1.55                    | hypothetical protein                                                             | Energy production and conversion, Coenzyme transport and metabolism   |
| SO_3774 | -           | 1.17                    | bifunctional proline dehydrogenase/pyrroline-5-carboxylate dehydrogenase         | Amino acid transport and metabolism, Energy production and conversion |
| SO_3800 | -           | 2.66                    | serine protease                                                                  | Posttranslational modification, protein turnover, chaperones          |
| SO_3808 | -           | 1.57                    | hypothetical protein                                                             | Function unknown                                                      |
| SO_3813 | -           | -1.22                   | hypothetical protein                                                             | Function unknown                                                      |

Table S3: significantly regulated genes in  $\Delta arcS$  mutants under aerobic growth conditions

| ORF     | Gene        | Regulation <sup>1</sup> | Product                                          | COG description                                                                                |
|---------|-------------|-------------------------|--------------------------------------------------|------------------------------------------------------------------------------------------------|
| SO_3840 | -           | -1.31                   | ECF subfamily RNA polymerase sigma factor        | Transcription                                                                                  |
| SO_3847 | -           | -1.41                   | hypothetical protein                             | Function unknown                                                                               |
| SO_3848 | -           | -1.20                   | hypothetical protein                             | Function unknown                                                                               |
| SO_3857 | -           | -1.41                   | PAP2 family protein                              | Lipid transport and metabolism                                                                 |
| SO_3864 | <i>modB</i> | 1.20                    | molybdate ABC transporter permease protein       | Inorganic ion transport and metabolism                                                         |
| SO_3867 | -           | -1.53                   | Cro/CI family transcriptional regulator          | Transcription                                                                                  |
| SO_3877 | -           | -1.09                   | hypothetical protein                             | Function unknown                                                                               |
| SO_3884 | -           | -1.45                   | phage integrase family site specific recombinase | Replication, recombination and repair                                                          |
| SO_3895 | -           | -1.08                   | HesA/MoeB/ThiF family protein                    | Coenzyme transport and metabolism                                                              |
| SO_3913 | -           | 2.57                    | putative hydroxylase                             | Function unknown                                                                               |
| SO_3914 | -           | 2.58                    | TonB-dependent receptor, putative                | Inorganic ion transport and metabolism                                                         |
| SO_3915 | -           | 1.39                    | hypothetical protein                             | Cell motility                                                                                  |
| SO_3942 | -           | 1.68                    | serine protease                                  | Posttranslational modification, protein turnover, chaperones                                   |
| SO_3967 | -           | -1.08                   | hypothetical protein                             | Inorganic ion transport and metabolism                                                         |
| SO_3969 | -           | -3.20                   | OmpA family protein                              | Cell wall/membrane/envelope biogenesis                                                         |
| SO_3980 | <i>nrfA</i> | 1.43                    | cytochrome c nitrite reductase                   | Inorganic ion transport and metabolism                                                         |
| SO_3983 | -           | -1.23                   | hypothetical protein                             | Function unknown                                                                               |
| SO_3987 | -           | -1.00                   | hypothetical protein                             | Function unknown                                                                               |
| SO_4012 | -           | -1.83                   | hypothetical protein                             | Function unknown                                                                               |
| SO_4013 | -           | -2.49                   | hypothetical protein                             | Function unknown                                                                               |
| SO_4014 | -           | -3.18                   | AcrB/AcrD/AcrF family protein                    | Defense mechanisms                                                                             |
| SO_4015 | -           | -4.20                   | hypothetical protein                             | Cell wall/membrane/envelope biogenesis                                                         |
| SO_4051 | -           | -1.24                   | HlyD family secretion protein                    | Defense mechanisms                                                                             |
| SO_4052 | -           | -1.31                   | MarR family transcriptional regulator            | Transcription                                                                                  |
| SO_4054 | <i>metF</i> | -1.02                   | 5,10-methylenetetrahydrofolate reductase         | Amino acid transport and metabolism                                                            |
| SO_4057 | <i>metJ</i> | -1.26                   | transcriptional repressor protein MetJ           | Transcription, Amino acid transport and metabolism                                             |
| SO_4058 | -           | -1.27                   | hypothetical protein                             | General function prediction only                                                               |
| SO_4069 | -           | -1.20                   | hypothetical protein                             | Secondary metabolites biosynthesis, transport and catabolism, General function prediction only |
| SO_4139 | -           | -1.27                   | hypothetical protein                             | General function prediction only                                                               |
| SO_4145 | -           | 3.19                    | hypothetical protein                             | Signal transduction mechanisms                                                                 |
| SO_4147 | -           | 1.59                    | ABC transporter, ATP-binding/permease protein    | Defense mechanisms                                                                             |

Table S3: significantly regulated genes in  $\Delta arcS$  mutants under aerobic growth conditions

| ORF     | Gene          | Regulation <sup>1</sup> | Product                                           | COG description                                                                                                                |
|---------|---------------|-------------------------|---------------------------------------------------|--------------------------------------------------------------------------------------------------------------------------------|
| SO_4148 | -             | 1.78                    | HlyD family secretion protein                     | Cell wall/membrane/envelope biogenesis                                                                                         |
| SO_4149 | -             | 3.18                    | RTX toxin, putative                               | Secondary metabolites biosynthesis, transport and catabolism                                                                   |
| SO_4157 | -             | 2.07                    | DNA-binding response regulator                    | Signal transduction mechanisms                                                                                                 |
| SO_4159 | -             | -1.35                   | hypothetical protein                              | Function unknown                                                                                                               |
| SO_4164 | -             | 1.43                    | hypothetical protein                              | Function unknown                                                                                                               |
| SO_4170 | -             | -1.06                   | C factor cell-cell signaling protein              | Lipid transport and metabolism, Secondary metabolites biosynthesis, transport and catabolism, General function prediction only |
| SO_4178 | -             | -1.58                   | hypothetical protein                              | Cell wall/membrane/envelope biogenesis, Defense mechanisms                                                                     |
| SO_4179 | -             | -1.49                   | glycosyl transferase, group 2 family protein      | Cell wall/membrane/envelope biogenesis                                                                                         |
| SO_4180 | -             | -1.44                   | hypothetical protein                              | Signal transduction mechanisms                                                                                                 |
| SO_4186 | -             | -1.00                   | hypothetical protein                              | Function unknown                                                                                                               |
| SO_4209 | -             | -1.88                   | hypothetical protein                              | Replication, recombination and repair                                                                                          |
| SO_4210 | -             | -2.36                   | hypothetical protein                              | Replication, recombination and repair                                                                                          |
| SO_4232 | -             | -1.21                   | long-chain fatty acid transport protein           | Lipid transport and metabolism                                                                                                 |
| SO_4238 | -             | -1.17                   | TPR domain-containing protein                     | General function prediction only                                                                                               |
| SO_4245 | <i>argA</i>   | -1.08                   | N-acetylglutamate synthase                        | Amino acid transport and metabolism                                                                                            |
| SO_4252 | -             | 1.96                    | prolyl oligopeptidase family protein              | Amino acid transport and metabolism                                                                                            |
| SO_4254 | <i>folE</i>   | -1.24                   | GTP cyclohydrolase I                              | Coenzyme transport and metabolism                                                                                              |
| SO_4255 | <i>pyrE</i>   | -1.16                   | orotate phosphoribosyltransferase                 | Nucleotide transport and metabolism                                                                                            |
| SO_4264 | <i>hsdS-2</i> | 1.82                    | type I restriction-modification system, S subunit | Defense mechanisms                                                                                                             |
| SO_4265 | <i>hsdM-2</i> | 1.51                    | type I restriction-modification system, M subunit | Defense mechanisms                                                                                                             |
| SO_4266 | -             | 1.32                    | hypothetical protein                              | Function unknown                                                                                                               |
| SO_4285 | -             | -1.27                   | hypothetical protein                              | Function unknown                                                                                                               |
| SO_4314 | <i>hemD</i>   | 1.21                    | uroporphyrinogen-III synthase                     | Coenzyme transport and metabolism                                                                                              |
| SO_4320 | <i>aggA</i>   | 1.13                    | agglutination protein                             | Cell wall/membrane/envelope biogenesis, Intracellular trafficking, secretion, and vesicular transport                          |
| SO_4321 | -             | 1.12                    | OmpA family protein                               | Cell wall/membrane/envelope biogenesis                                                                                         |
| SO_4335 | -             | -1.42                   | phosphatidylglycerophosphatase B, putative        | Lipid transport and metabolism                                                                                                 |
| SO_4340 | -             | -1.41                   | hypothetical protein                              | Function unknown                                                                                                               |
| SO_4342 | -             | -1.07                   | hypothetical protein                              | Function unknown                                                                                                               |
| SO_4343 | -             | -1.02                   | aminotransferase, class V                         | Amino acid transport and metabolism                                                                                            |
| SO_4356 | -             | -1.91                   | hypothetical protein                              | Function unknown                                                                                                               |
| SO_4361 | -             | -1.12                   | hypothetical protein                              | Function unknown                                                                                                               |



Table S3: significantly regulated genes in  $\Delta arcS$  mutants under aerobic growth conditions

| ORF     | Gene | Regulation <sup>1</sup> | Product                                              | COG description                                                                                                                                      |
|---------|------|-------------------------|------------------------------------------------------|------------------------------------------------------------------------------------------------------------------------------------------------------|
| SO_4412 | -    | -1.72                   | hypothetical protein                                 | Function unknown                                                                                                                                     |
| SO_4413 | -    | 3.12                    | kynureninase                                         | Amino acid transport and metabolism                                                                                                                  |
| SO_4414 | -    | 2.67                    | hypothetical protein                                 | Function unknown                                                                                                                                     |
| SO_4418 | -    | -1.31                   | trypanothione synthetase domain-containing protein   | Function unknown                                                                                                                                     |
| SO_4419 | -    | -1.44                   | hypothetical protein                                 | Amino acid transport and metabolism                                                                                                                  |
| SO_4420 | -    | -1.39                   | M24/M37 family peptidase                             | Cell wall/membrane/envelope biogenesis                                                                                                               |
| SO_4425 | -    | -1.50                   | GGDEF family protein                                 | Signal transduction mechanisms                                                                                                                       |
| SO_4457 | -    | 1.48                    | GGDEF domain-containing protein                      | Signal transduction mechanisms                                                                                                                       |
| SO_4463 | -    | 1.90                    | prolyl 4-hydroxylase alpha subunit                   | Function unknown                                                                                                                                     |
| SO_4469 | -    | -1.38                   | alcohol dehydrogenase, iron-containing               | Energy production and conversion                                                                                                                     |
| SO_4474 | -    | -1.69                   | hypothetical protein                                 | Function unknown                                                                                                                                     |
| SO_4481 | -    | -1.10                   | hypothetical protein                                 | Function unknown                                                                                                                                     |
| SO_4498 | -    | -1.52                   | hypothetical protein                                 | Amino acid transport and metabolism                                                                                                                  |
| SO_4505 | -    | 1.19                    | hypothetical protein                                 | Function unknown                                                                                                                                     |
| SO_4515 | -    | -1.43                   | formate dehydrogenase, C subunit, putative           | Energy production and conversion                                                                                                                     |
| SO_4520 | -    | 1.34                    | coproporphyrinogen III oxidase                       | Coenzyme transport and metabolism                                                                                                                    |
| SO_4527 | -    | -1.03                   | integral membrane domain-containing protein          | Carbohydrate transport and metabolism, Amino acid transport and metabolism, General function prediction only                                         |
| SO_4544 | -    | -1.11                   | hypothetical protein                                 | Function unknown                                                                                                                                     |
| SO_4555 | -    | -1.02                   | drug resistance transporter, Bcr/CflA family protein | Carbohydrate transport and metabolism, Amino acid transport and metabolism, Inorganic ion transport and metabolism, General function prediction only |
| SO_4557 | -    | -3.72                   | methyl-accepting chemotaxis protein                  | Cell motility, Signal transduction mechanisms                                                                                                        |
| SO_4561 | -    | -1.21                   | hypothetical protein                                 | Function unknown                                                                                                                                     |
| SO_4570 | -    | -1.25                   | hypothetical protein                                 | Function unknown                                                                                                                                     |
| SO_4577 | -    | -1.22                   | hypothetical protein                                 | Signal transduction mechanisms                                                                                                                       |
| SO_4592 | -    | 1.57                    | hypothetical protein                                 | Function unknown                                                                                                                                     |
| SO_4593 | -    | 1.68                    | hypothetical protein                                 | Function unknown                                                                                                                                     |
| SO_4604 | -    | -1.10                   | hypothetical protein                                 | Function unknown                                                                                                                                     |
| SO_4623 | -    | 1.94                    | DNA-binding response regulator                       | Signal transduction mechanisms, Transcription                                                                                                        |
| SO_4628 | -    | 1.74                    | sulfatase                                            | Cell wall/membrane/envelope biogenesis                                                                                                               |
| SO_4681 | -    | -1.65                   | glycosyl transferase, group 1 family protein         | Cell wall/membrane/envelope biogenesis                                                                                                               |
| SO_4700 | -    | 3.55                    | hypothetical protein                                 | Function unknown                                                                                                                                     |
| SO_4705 | -    | 1.51                    | transcriptional regulator, putative                  | Transcription                                                                                                                                        |

Table S3: significantly regulated genes in  $\Delta arcS$  mutants under aerobic growth conditions

| ORF      | Gene        | Regulation <sup>1</sup> | Product                                                                         | COG description                                            |
|----------|-------------|-------------------------|---------------------------------------------------------------------------------|------------------------------------------------------------|
| SO_4708  | -           | -1.34                   | hypothetical protein                                                            | Function unknown                                           |
| SO_4718  | -           | 1.78                    | sigma-54 dependent response regulator                                           | Signal transduction mechanisms                             |
| SO_4727  | -           | -1.54                   | hypothetical protein                                                            | Coenzyme transport and metabolism                          |
| SO_4728  | -           | -1.64                   | hypothetical protein                                                            | Function unknown                                           |
| SO_4729  | -           | -1.12                   | hypothetical protein                                                            | Function unknown                                           |
| SO_4730  | <i>hemN</i> | 1.53                    | coproporphyrinogen III oxidase                                                  | Coenzyme transport and metabolism                          |
| SO_4743  | -           | 1.39                    | TonB-dependent receptor, putative                                               | Inorganic ion transport and metabolism                     |
| SO_A0006 | -           | 1.70                    | ParA family protein                                                             | Cell cycle control, cell division, chromosome partitioning |
| SO_A0012 | <i>rulB</i> | -1.20                   | SOS mutagenesis protein RulB                                                    | Replication, recombination and repair                      |
| SO_A0013 | <i>rulA</i> | -1.28                   | SOS mutagenesis protein RulA                                                    | Transcription, Signal transduction mechanisms              |
| SO_A0023 | <i>higA</i> | -1.47                   | plasmid maintenance system antidote protein HigA                                | General function prediction only                           |
| SO_A0036 | -           | -1.22                   | HicB-related protein                                                            | Function unknown                                           |
| SO_A0043 | -           | -1.17                   | hypothetical protein                                                            | Function unknown                                           |
| SO_A0047 | -           | 1.60                    | hypothetical protein                                                            | Function unknown                                           |
| SO_A0049 | -           | 1.74                    | toxin secretion ABC transporter, ATP-binding subunit/permease protein, putative | Defense mechanisms                                         |
| SO_A0050 | -           | 1.34                    | toxin secretion, membrane fusion protein                                        | Cell wall/membrane/envelope biogenesis                     |
| SO_A0056 | -           | -1.19                   | hypothetical protein                                                            | Function unknown                                           |
| SO_A0057 | -           | -1.91                   | hypothetical protein                                                            | Function unknown                                           |
| SO_A0058 | -           | -1.82                   | hypothetical protein                                                            | Function unknown                                           |
| SO_A0059 | -           | -1.28                   | hypothetical protein                                                            | Function unknown                                           |
| SO_A0068 | -           | -1.95                   | hypothetical protein                                                            | Transcription                                              |
| SO_A0070 | -           | -1.63                   | hypothetical protein                                                            | Amino acid transport and metabolism                        |
| SO_A0087 | -           | -1.36                   | hypothetical protein                                                            | Cell cycle control, cell division, chromosome partitioning |
| SO_A0185 | -           | -1.02                   | transcriptional regulator                                                       | Transcription                                              |
| SO_A0159 | -           | -1.29                   | multidrug efflux transporter                                                    | Inorganic ion transport and metabolism                     |

<sup>1</sup>regulation is given in log fold change
