# Supplementary material
Source: PubMed Central journal article supplement (PMC2869118)
Supplement: supp_76_10_3263__4.pdf [file supp_76_10_3263__4.pdf]

|        |                      | wild type         | $\Delta$ arcS     | KI-arcS           | $\Delta$ hptA     | KI-hptA           | $\Delta$ arcA     | KI-arcA           |         |         |
|--------|----------------------|-------------------|-------------------|-------------------|-------------------|-------------------|-------------------|-------------------|---------|---------|
|        |                      | 41.9<br>$\pm$ 1.7 | 55.0<br>$\pm$ 1.3 | 41.8<br>$\pm$ 2.7 | 55.0<br>$\pm$ 1.6 | 44.1<br>$\pm$ 2.0 | 64.5<br>$\pm$ 1.2 | 44.4<br>$\pm$ 0.7 |         |         |
| growth | doubling time in min | 56.6<br>$\pm$ 1.2 | 73.4<br>$\pm$ 3.5 | n/a               | 70.9<br>$\pm$ 4.0 | n/a               | 88.7<br>$\pm$ 5.6 | n/a               | silent  | +pBAD33 |
|        |                      | 57.6<br>$\pm$ 0.9 | 72.2<br>$\pm$ 3.5 | n/a               | 72.9<br>$\pm$ 2.6 | n/a               | 87.9<br>$\pm$ 5.8 | n/a               | induced |         |
|        | n/a                  | 70.5<br>$\pm$ 2.4 | n/a               | 67.2<br>$\pm$ 3.1 | n/a               | 65.3<br>$\pm$ 2.0 | n/a               | silent            |         |         |
|        | n/a                  | 61.9<br>$\pm$ 1.4 | n/a               | 63.2<br>$\pm$ 2.9 | n/a               | 64.0<br>$\pm$ 1.8 | n/a               | induced           |         |         |
|        |                      |                   | +pBAD33-arcS      | +pBAD33-hptA      | +pBAD33-arcA      |                   |                   |                   |         |         |

**Figure S1: Phenotypic complementation of growth defects in  $\Delta$ arcS,  $\Delta$ hptA, and  $\Delta$ arcA mutant strains.** The corresponding strains were grown aerobically to stationary phase, and the doubling time was calculated from the exponential phase. KI, complementation by restoring the wild type phenotype by reintroducing a wild type copy of the appropriate gene into the mutated locus. For complementation by ectopic gene expression, the appropriate genes were cloned into pBAD33 under control of the inducible  $P_{BAD}$  promoter. Mutants bearing the empty vector (rows 2 and 3) or the vector harboring the corresponding complementing gene (rows 4 and 5) were grown under inducing and non-inducing (silent) conditions. n/a, not tested.
