# Supplementary material
Source: PubMed Central journal article supplement (PMC2869118)
Supplement: supp_76_10_3263__5.pdf [file supp_76_10_3263__5.pdf]

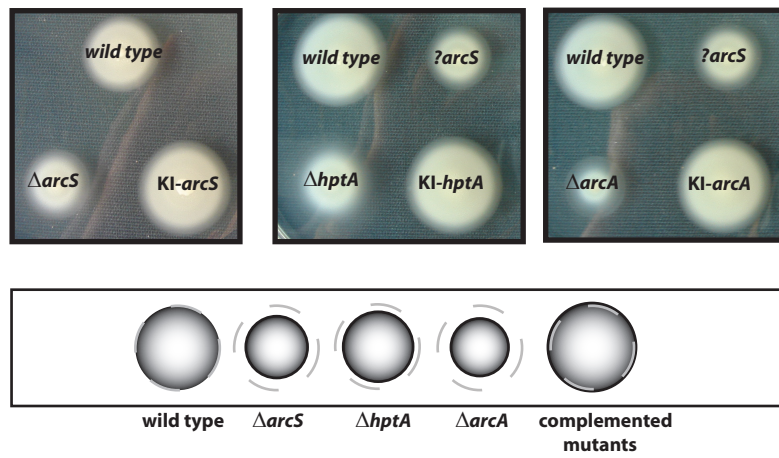

**Figure S2: Motility analysis of  $\Delta arcS$ ,  $\Delta hptA$ , and  $\Delta arcA$ .** Aliquots of exponentially growing cultures of the corresponding strains were spotted on soft agar plate (upper panel). Motility based on radial expansion was analyzed after 24 h (lower panel). KI, complemented ('knock-in') mutant. The dashed circles in the lower panel mark the radial extension of wild type cells.
