# Supplementary material
Source: PubMed Central journal article supplement (PMC2869118)
Supplement: supp_76_10_3263__6.pdf [file supp_76_10_3263__6.pdf]

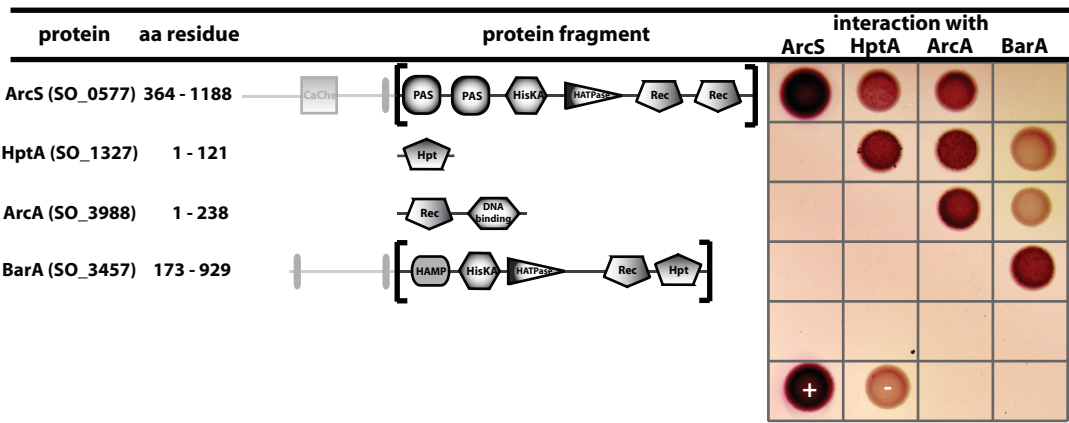

#### Plasmid combinations used in this study

| strain              | genotype                                                                                | plasmid                                                           | protein fragment encoded on plasmid                                  | gene                                               | selection marker                     |
|---------------------|-----------------------------------------------------------------------------------------|-------------------------------------------------------------------|----------------------------------------------------------------------|----------------------------------------------------|--------------------------------------|
| BTH101 <sup>a</sup> | F, <i>cya-99, araD139, galE15, galK16, rpsL1 (Str<sup>r</sup>), hsdR2, mcrA1, mcrB1</i> | pUT18C_PAS_ArcS<br>pKT25_ArcS                                     | PASI-PASII-HisKA-HATPase-Rec-Rec<br>PASI-PASII-HisKA-HATPase-Rec-Rec | SO_0577 ( <i>arcS</i> )<br>SO_0577 ( <i>arcS</i> ) | Amp <sup>R</sup><br>Kan <sup>R</sup> |
| BTH101 <sup>a</sup> | F, <i>cya-99, araD139, galE15, galK16, rpsL1 (Str<sup>r</sup>), hsdR2, mcrA1, mcrB1</i> | pUT18_PAS_ArcS<br>pKNT25_HptA                                     | PASI-PASII-HisKA-HATPase-Rec-Rec<br>HptA <sup>d</sup>                | SO_0577 ( <i>arcS</i> )<br>SO_1327 ( <i>hptA</i> ) | Amp <sup>R</sup><br>Kan <sup>R</sup> |
| BTH101 <sup>a</sup> | F, <i>cya-99, araD139, galE15, galK16, rpsL1 (Str<sup>r</sup>), hsdR2, mcrA1, mcrB1</i> | pUT18C_PAS_ArcS<br>pKNT25_ArcA                                    | PASI-PASII-HisKA-HATPase-Rec-Rec<br>ArcA <sup>d</sup>                | SO_0577 ( <i>arcS</i> )<br>SO_3988 ( <i>arcA</i> ) | Amp <sup>R</sup><br>Kan <sup>R</sup> |
| BTH101 <sup>a</sup> | F, <i>cya-99, araD139, galE15, galK16, rpsL1 (Str<sup>r</sup>), hsdR2, mcrA1, mcrB1</i> | pUT18_HptA<br>pKT25_HptA                                          | HptA <sup>d</sup><br>HptA <sup>d</sup>                               | SO_1327 ( <i>hptA</i> )<br>SO_1327 ( <i>hptA</i> ) | Amp <sup>R</sup><br>Kan <sup>R</sup> |
| BTH101 <sup>a</sup> | F, <i>cya-99, araD139, galE15, galK16, rpsL1 (Str<sup>r</sup>), hsdR2, mcrA1, mcrB1</i> | pUT18C_HptA<br>pKT25_ArcA                                         | HptA <sup>d</sup><br>ArcA <sup>d</sup>                               | SO_1327 ( <i>hptA</i> )<br>SO_3988 ( <i>arcA</i> ) | Amp <sup>R</sup><br>Kan <sup>R</sup> |
| BTH101 <sup>a</sup> | F, <i>cya-99, araD139, galE15, galK16, rpsL1 (Str<sup>r</sup>), hsdR2, mcrA1, mcrB1</i> | pUT18C_ArcA<br>pKNT25_ArcA                                        | ArcA <sup>d</sup><br>ArcA <sup>d</sup>                               | SO_3988 ( <i>arcA</i> )<br>SO_3988 ( <i>arcA</i> ) | Amp <sup>R</sup><br>Kan <sup>R</sup> |
| BTH101 <sup>a</sup> | F, <i>cya-99, araD139, galE15, galK16, rpsL1 (Str<sup>r</sup>), hsdR2, mcrA1, mcrB1</i> | pUT18C_BarA<br>pKT25_BarA                                         | HAMP-HisKA-HATPase-Rec-Hpt<br>HAMP-HisKA-HATPase-Rec-Hpt             | SO_3457 ( <i>barA</i> )<br>SO_3457 ( <i>barA</i> ) | Amp <sup>R</sup><br>Kan <sup>R</sup> |
| BTH101 <sup>a</sup> | F, <i>cya-99, araD139, galE15, galK16, rpsL1 (Str<sup>r</sup>), hsdR2, mcrA1, mcrB1</i> | pUT18C- <i>zip</i> <sup>b</sup><br>pKT25- <i>zip</i> <sup>b</sup> | GCN4 <sup>d</sup><br>GCN4 <sup>d</sup>                               | YEL009C ( <i>GCN4</i> )<br>YEL009C ( <i>GCN4</i> ) | Amp <sup>R</sup><br>Kan <sup>R</sup> |
| BTH101 <sup>a</sup> | F, <i>cya-99, araD139, galE15, galK16, rpsL1 (Str<sup>r</sup>), hsdR2, mcrA1, mcrB1</i> | pUT18C <sup>c</sup><br>pKT25 <sup>c</sup>                         | -<br>-                                                               | -<br>-                                             | Amp <sup>R</sup><br>Kan <sup>R</sup> |

<sup>a</sup>BTH101 strain (without plasmids) supplied by EUROMEDEX, France

<sup>b</sup>Plasmid for positive-control (coding for the yeast leucine zipper), supplied by EUROMEDEX, France

<sup>c</sup>Empty plasmid for negative control, supplied by EUROMEDEX, France

<sup>d</sup>Full-length protein

**Figure S3: Analysis of in vivo protein-protein interactions in a bacterial two-hybrid system.** The cloned fragments of the genes and the encoded domains (within brackets) are indicated. Interactions of indicated proteins fused to the T18 and T25 fragments, respectively, of the *B. pertussis* adenylate cyclase result in a red appearance of the colonies on McConkey agar. (+), positive control (T18-*zip*/T25-*zip*); (-) negative control (T18/T25 empty vectors). The combinations of plasmids used for the study are summarized in the table.
