# Supplementary material
Source: PubMed Central journal article supplement (PMC2869118)
Supplement: supp_76_10_3263__7.pdf [file supp_76_10_3263__7.pdf]

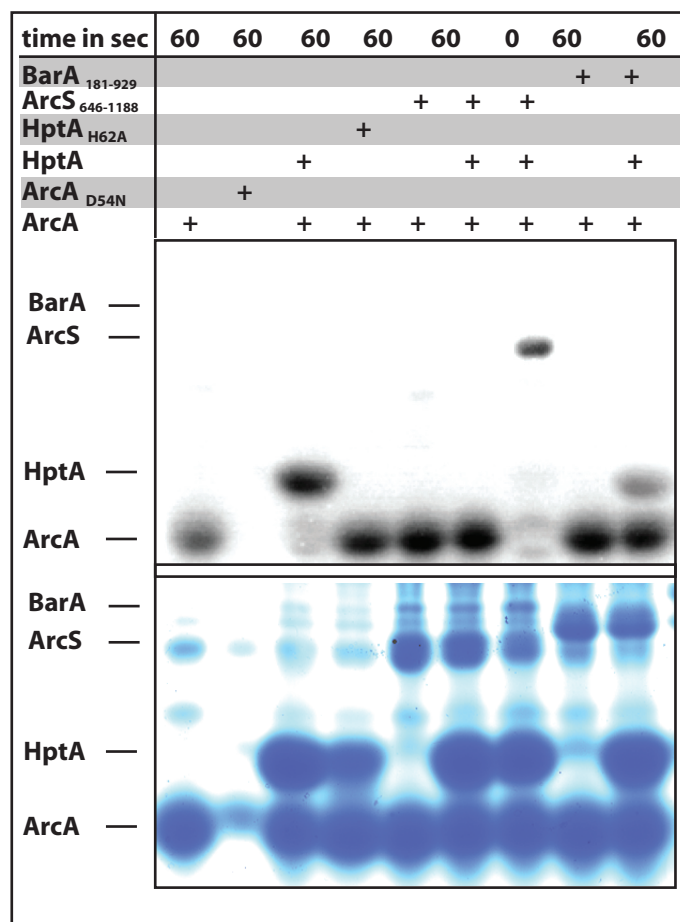

**Figure S4: Autoradiographic analysis of phosphotransfer between ArcS<sub>646-1188</sub>, GST-HptA, and ArcA.** 10  $\mu$ M phosphorylated ArcA was incubated for the given amount of time (top panel) with equimolar amounts of the indicated components and then separated by SDS-PAGE. The Coomassie-stained gel used for autoradiographic analysis is shown below.
