# Supplementary material
Source: PubMed Central journal article supplement (PMC2869118)
Supplement: supp_76_10_3263__8.pdf [file supp_76_10_3263__8.pdf]

| growth<br>doubling time<br>in min | wild type    | $\Delta arcS$ | $\Delta arcS \Delta hptA$ | $\Delta arcA$ | PBAD-33-arcB |
|-----------------------------------|--------------|---------------|---------------------------|---------------|--------------|
|                                   | silent       | 45.9<br>±1.0  | 72.3<br>±1.9              | 67.2<br>±2.2  |              |
| induced                           | 41.2<br>±0.8 | 44.2<br>±0.2  | 44.0<br>±0.3              | 84.9<br>±5.3  |              |

**Figure S5: Complementation of growth defects of *S. oneidensis* MR-1 Arc mutants by *E. coli* ArcB.** The corresponding *S. oneidensis* wild type or mutant strains harboring pBAD33-arcB were grown aerobically to stationary phase under inducing (lower panel) and non-inducing ('silent', upper panel) conditions. The doubling time was calculated from the exponential growth phase.
