# Supplementary material
Source: PubMed Central journal article supplement (PMC2869118)
Supplement: supp_76_10_3263__9.pdf [file supp_76_10_3263__9.pdf]

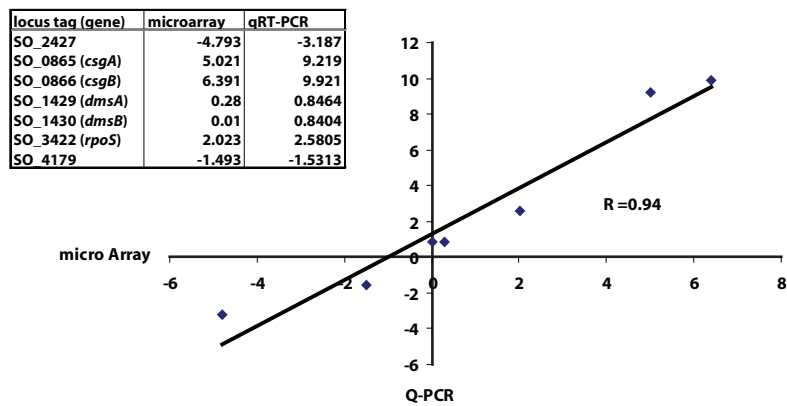

**Figure S6: Comparison of transcriptional changes in  $\Delta$ arcS mutants as determined by microarrays and q-RT-PCR.** Changes in transcriptional levels (log<sub>2</sub>) of 7 selected genes as determined by q-RT-PCR was plotted against the values determined by microarray analysis. The gene identities and the corresponding changes in transcriptional levels are listed in the table.
